# Supplementary material for: Electrochemically driven cross-electrophile esterification of alkyl halides
Source: Royal Society of Chemistry journal article supplement (doi:10.1039/d4gc02052a), 2024-01-01
Supplement: d4gc02052a1.pdf [file d4gc02052a1.pdf]

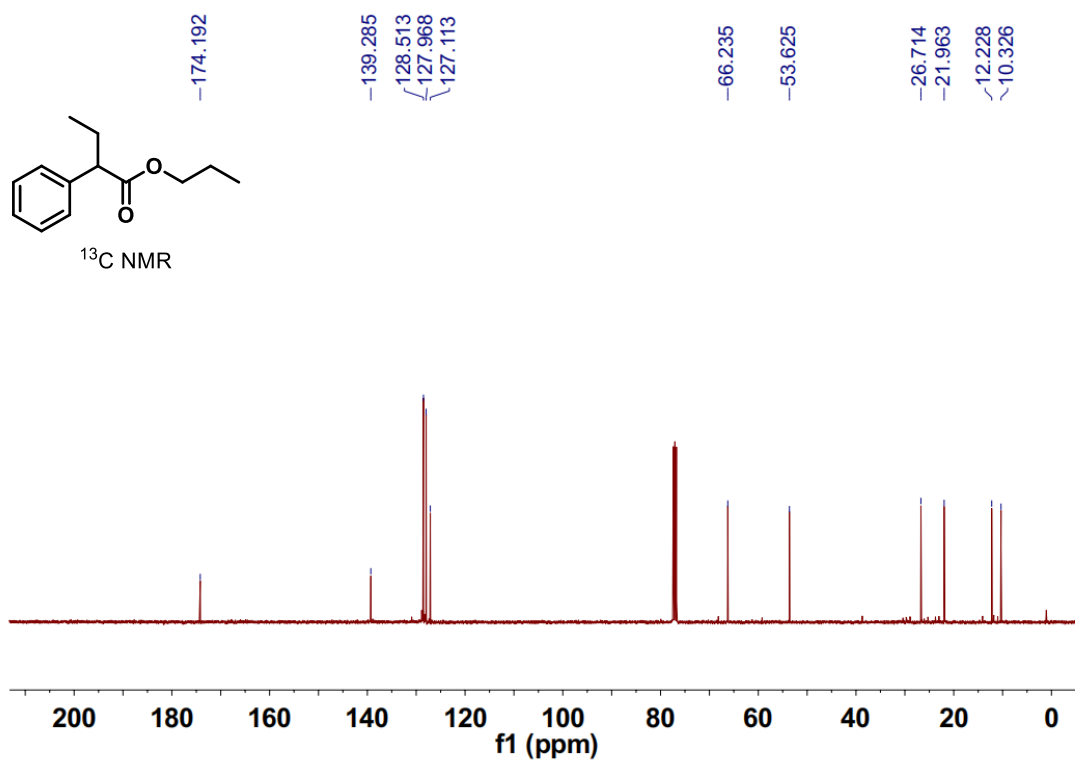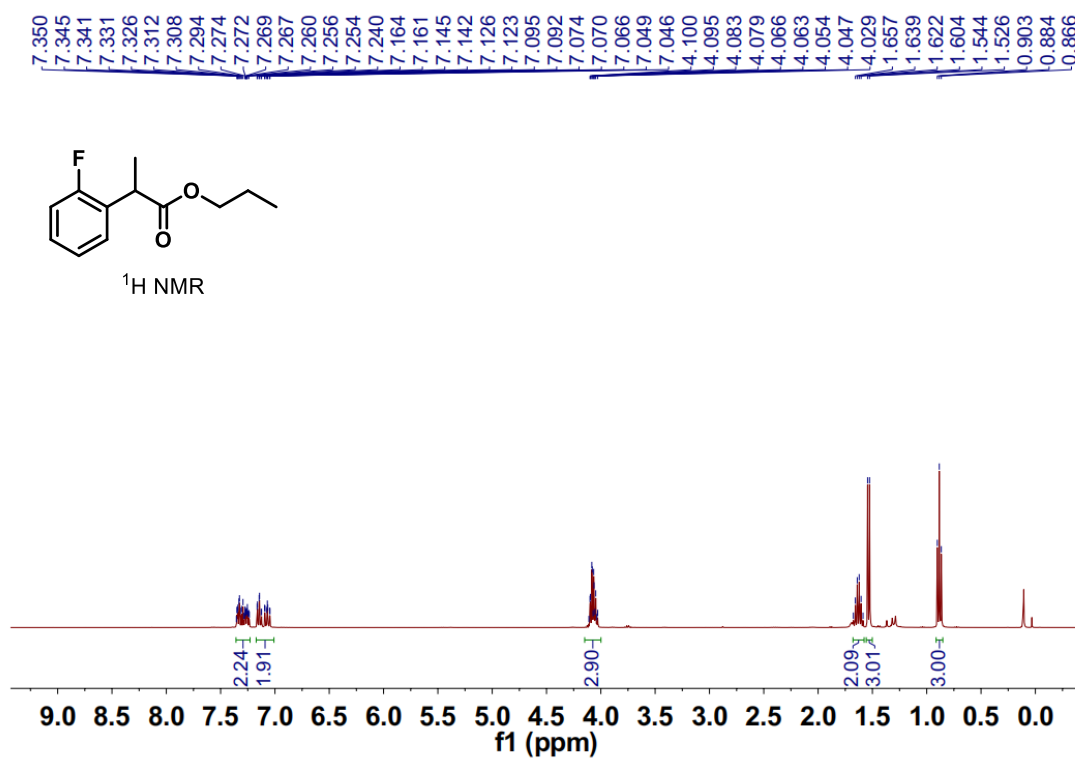

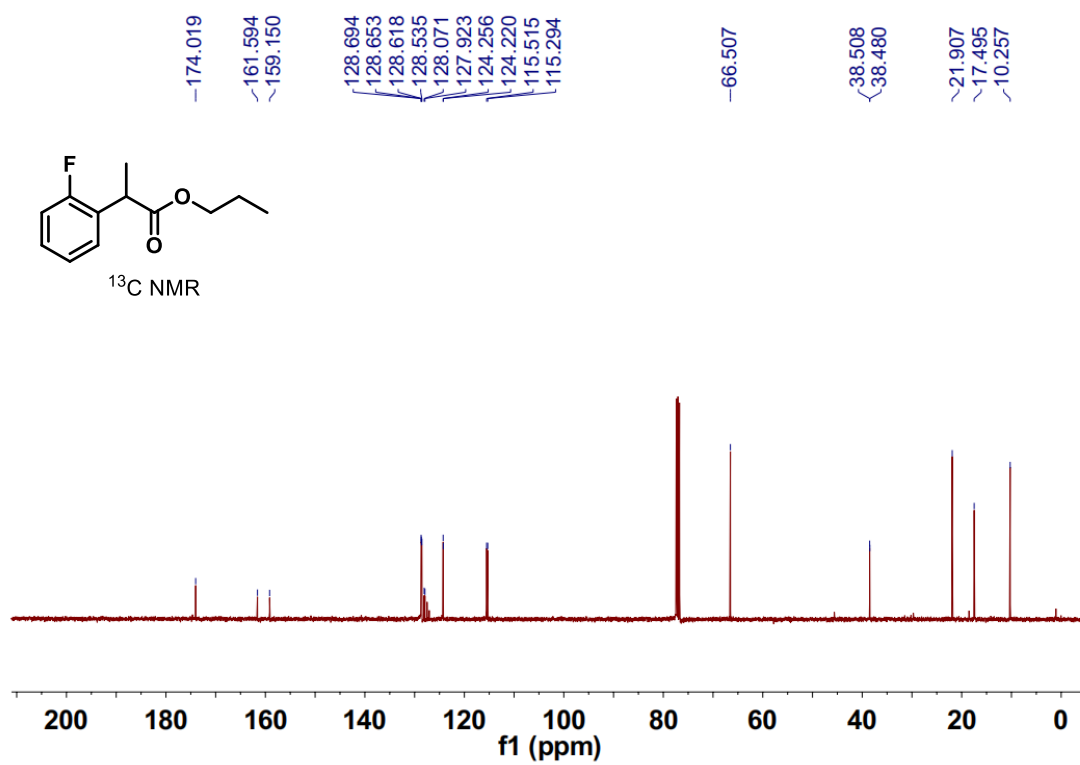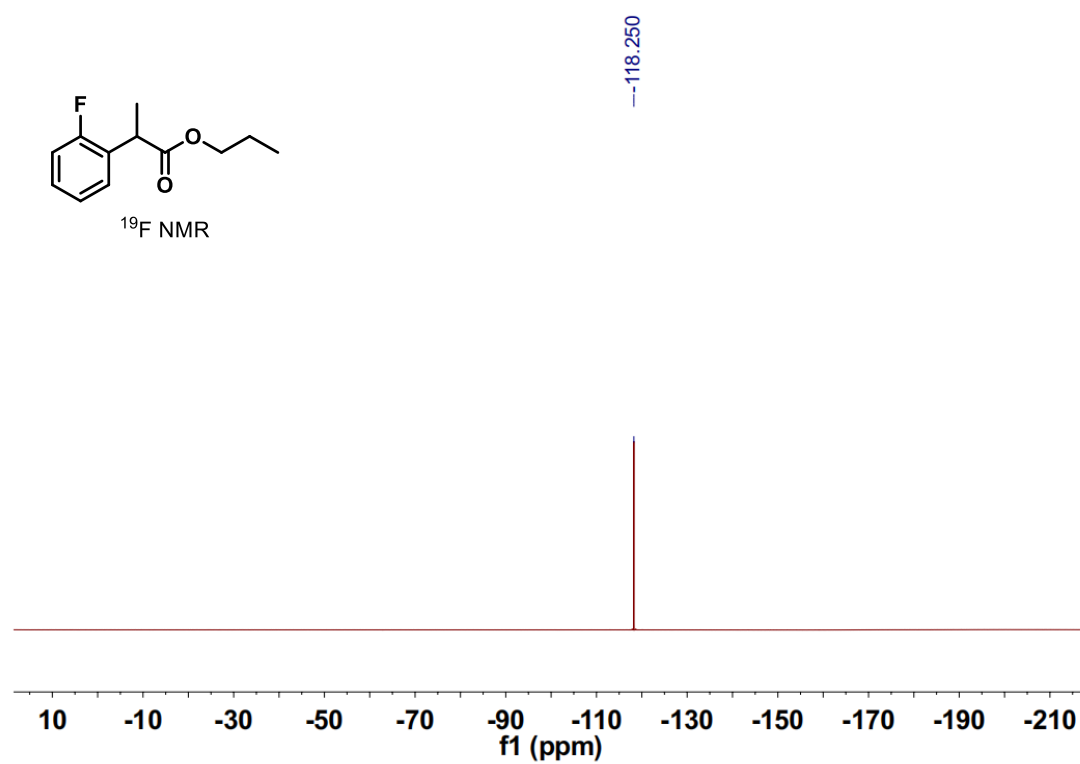

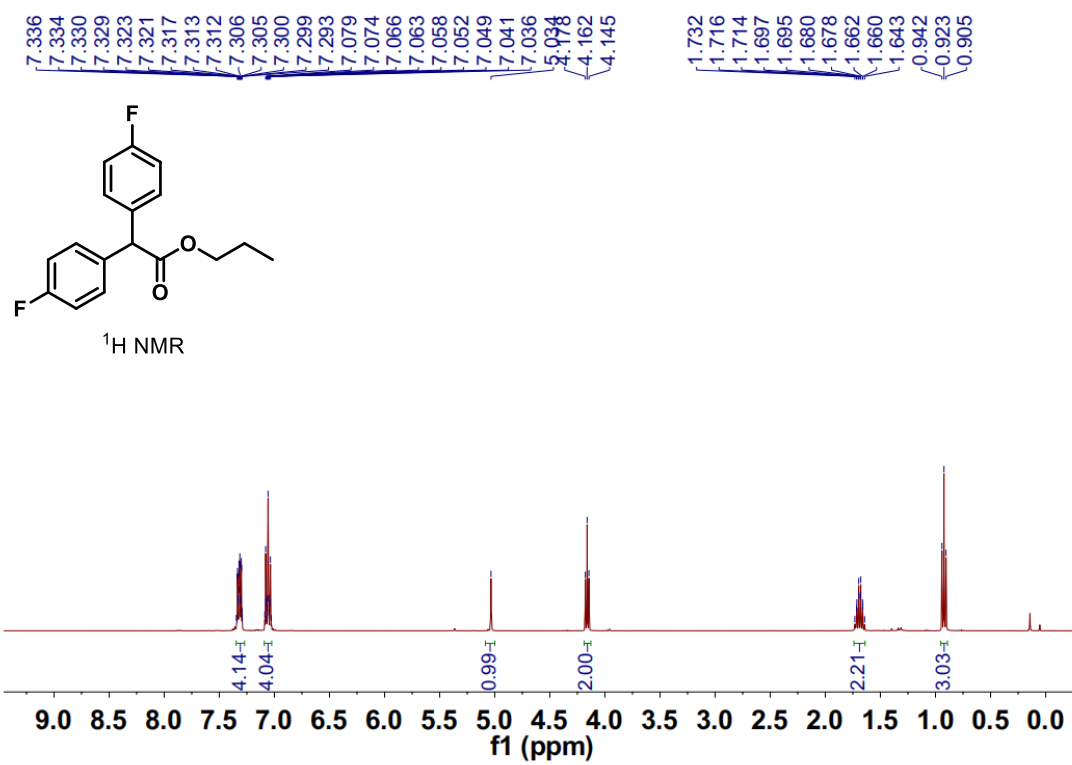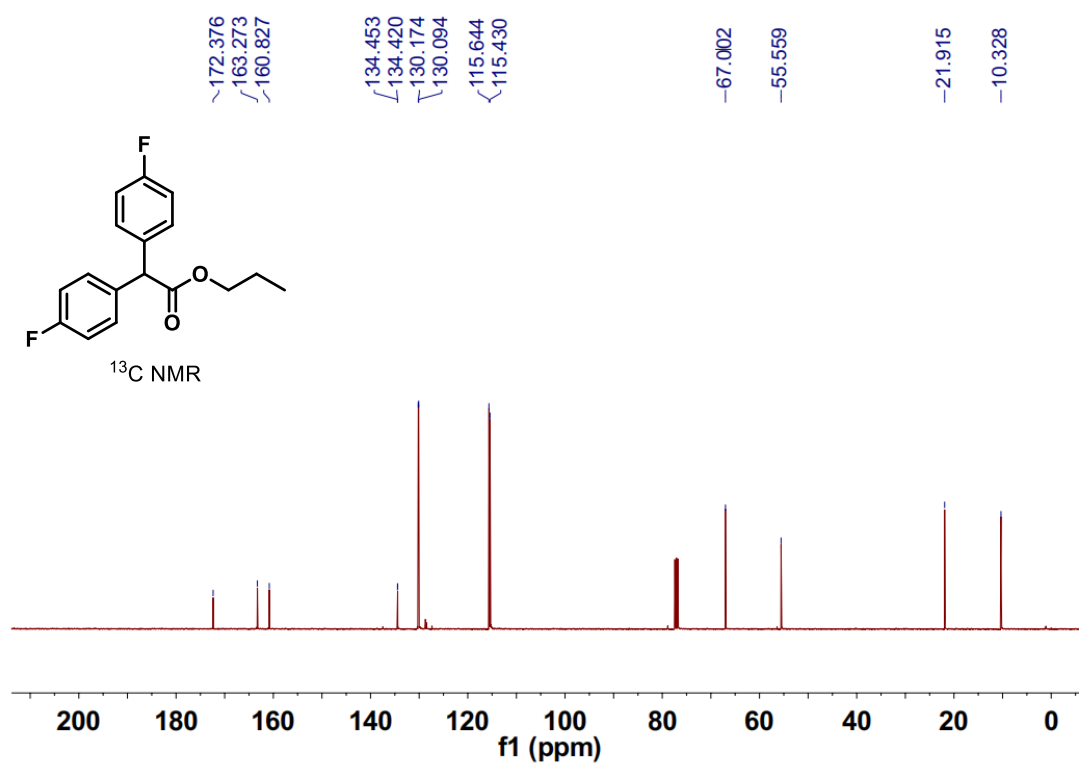

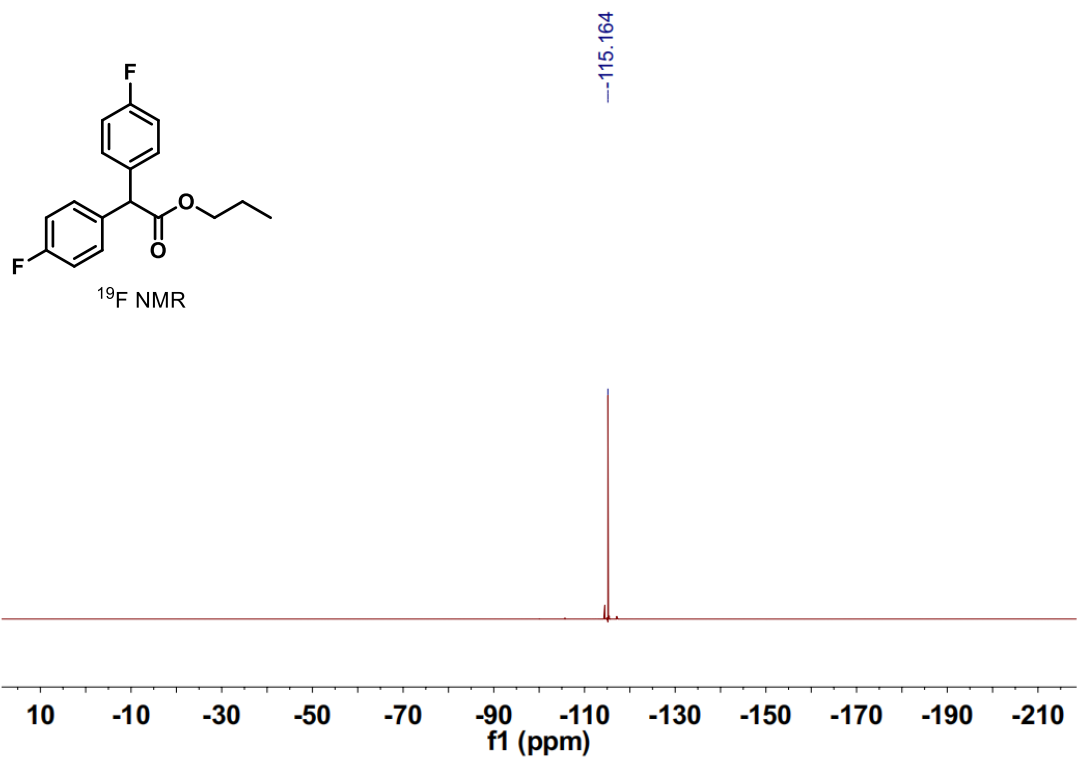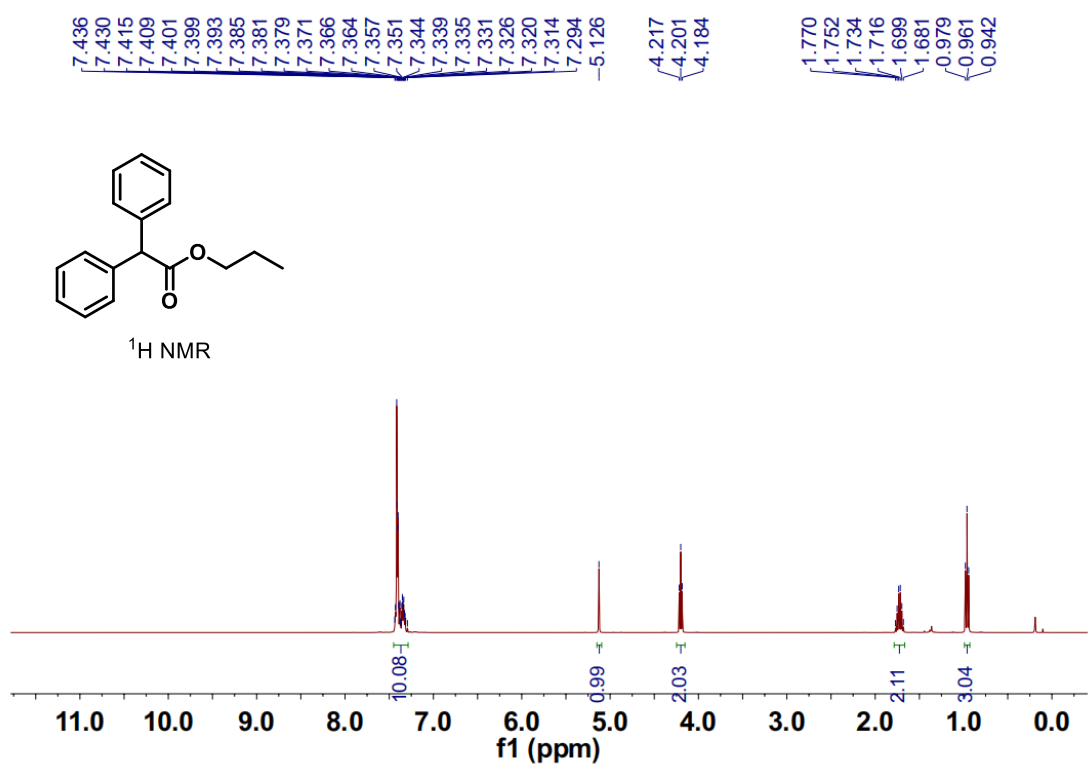

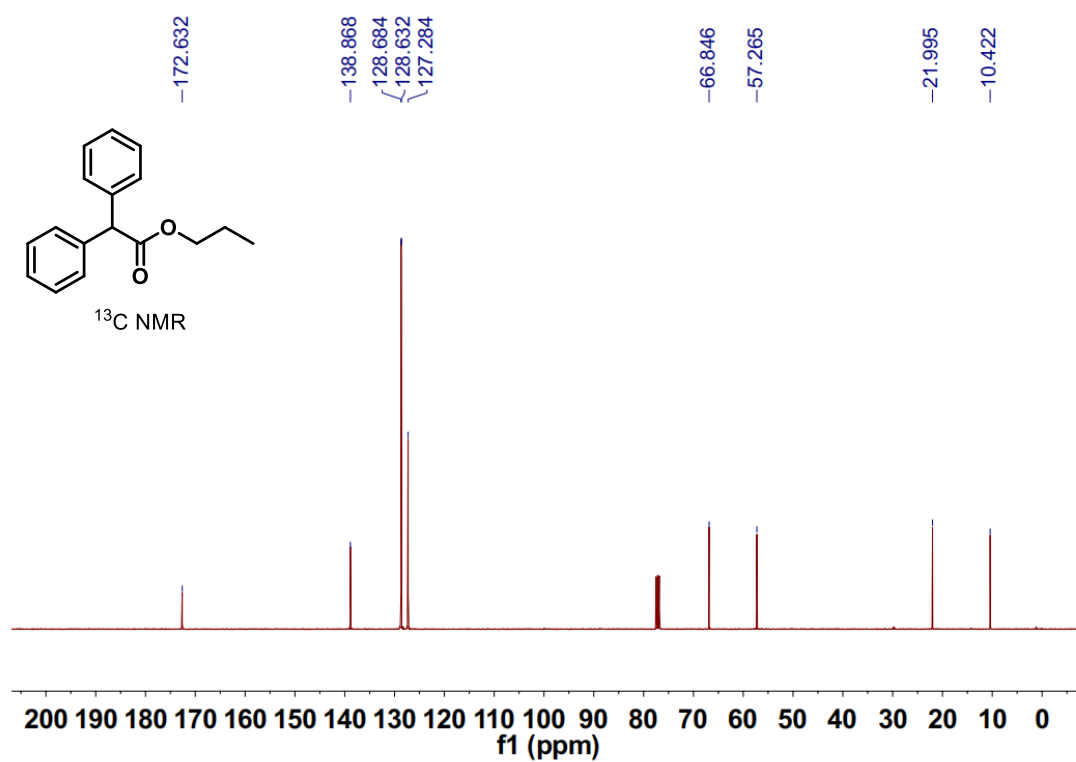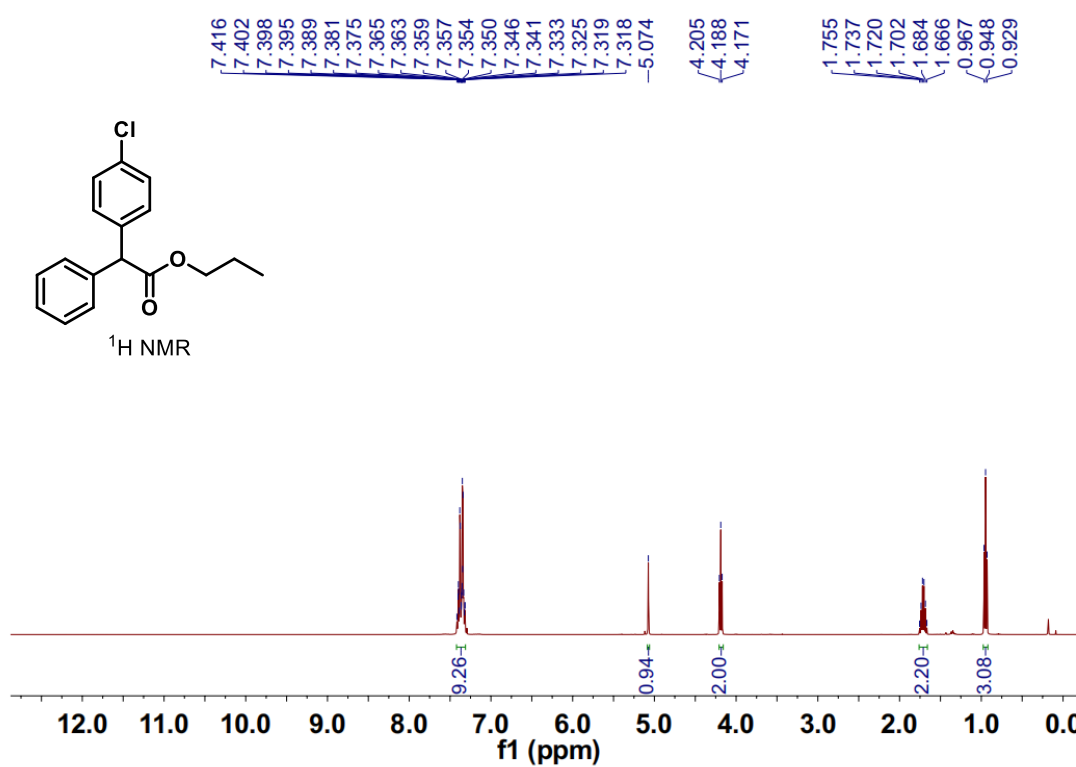

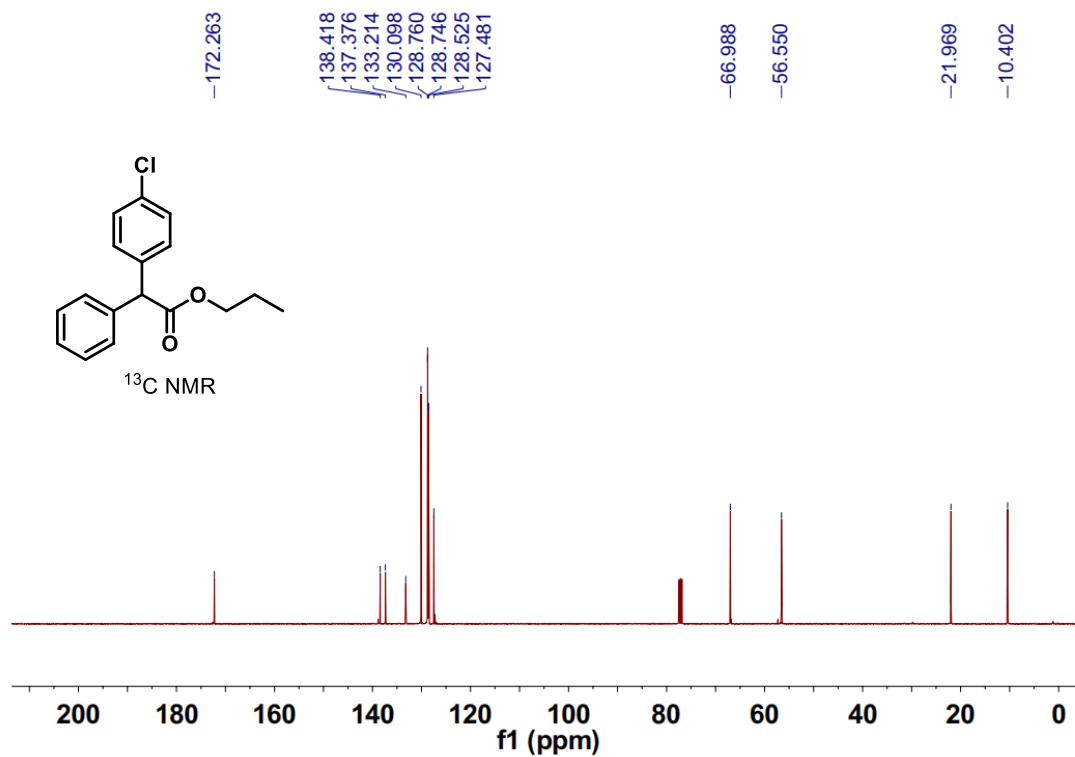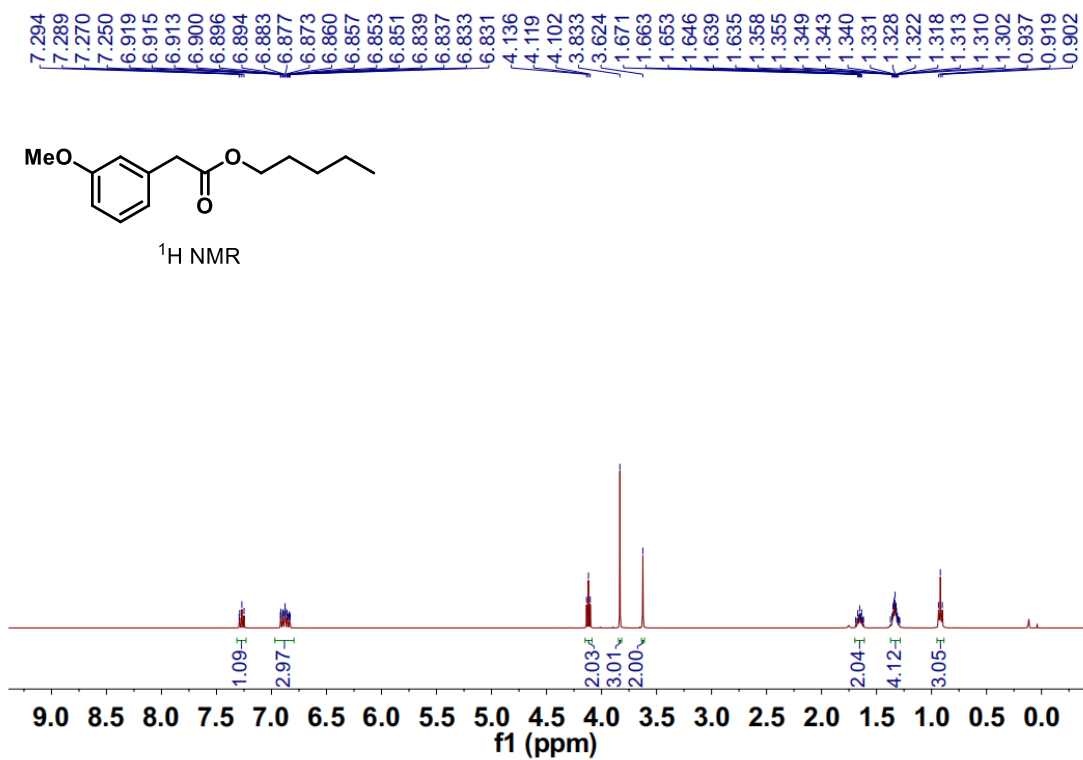

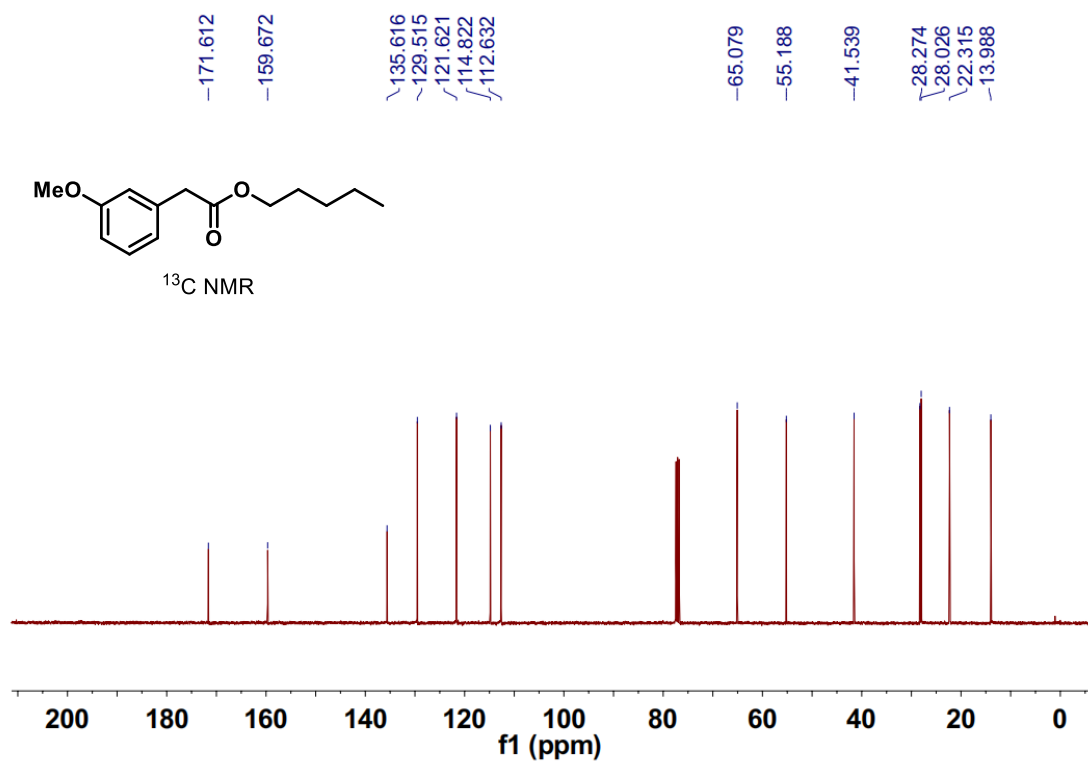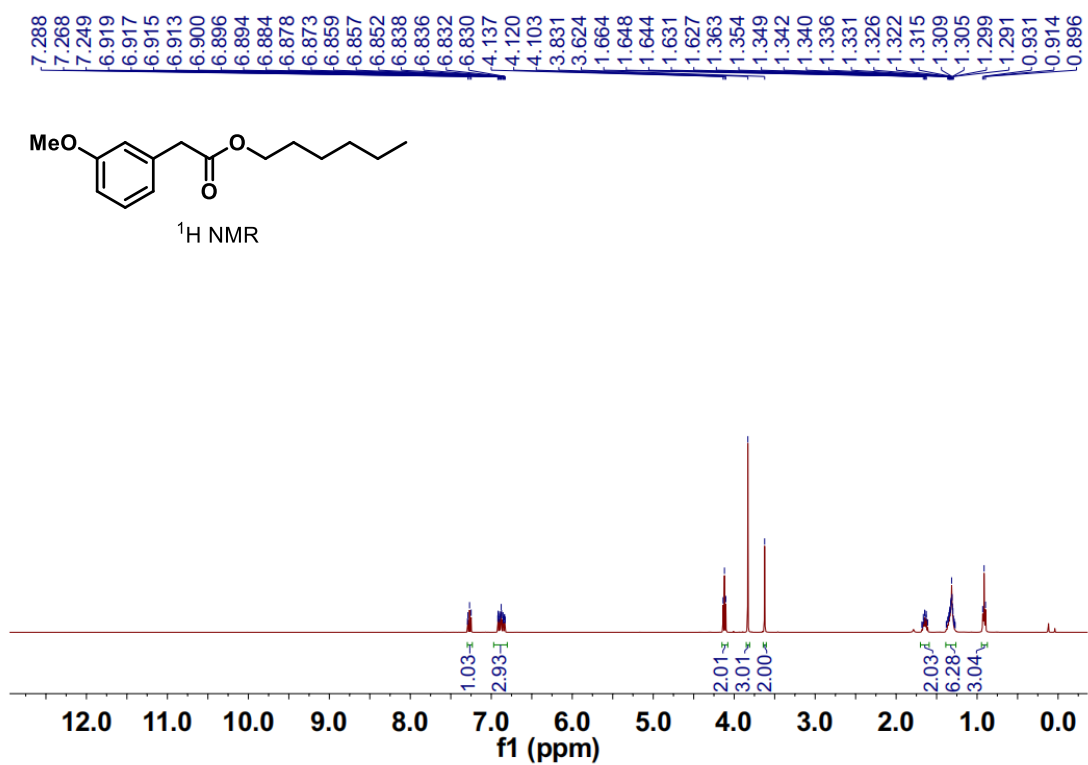

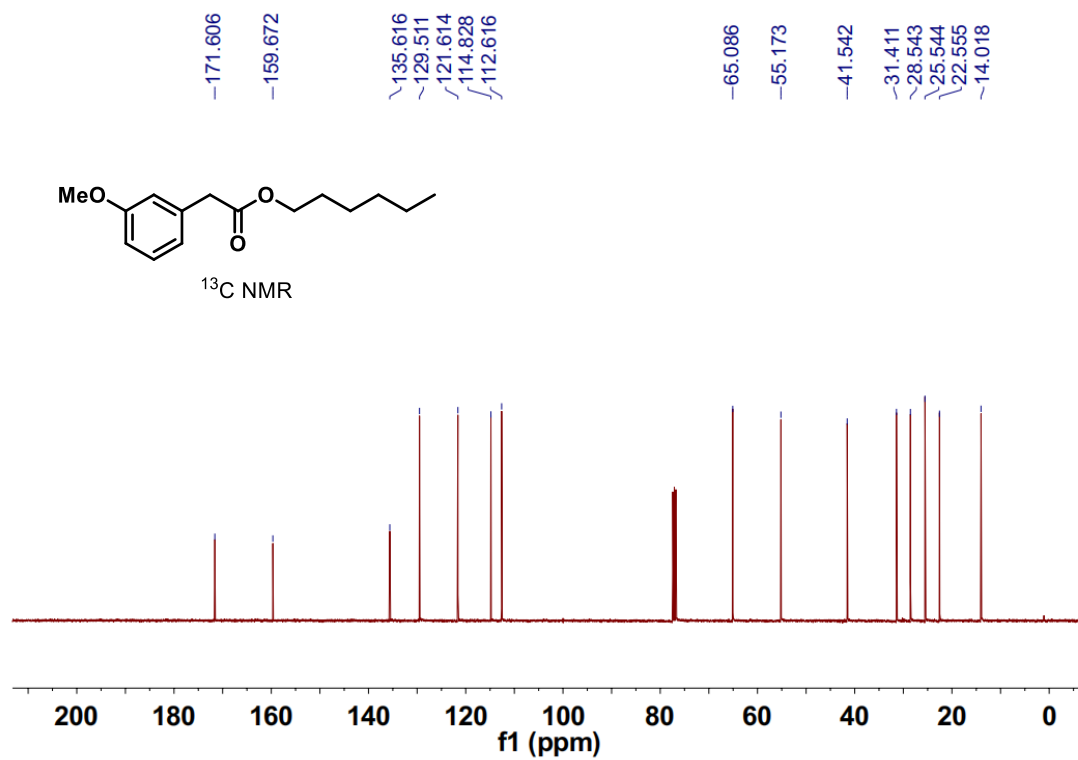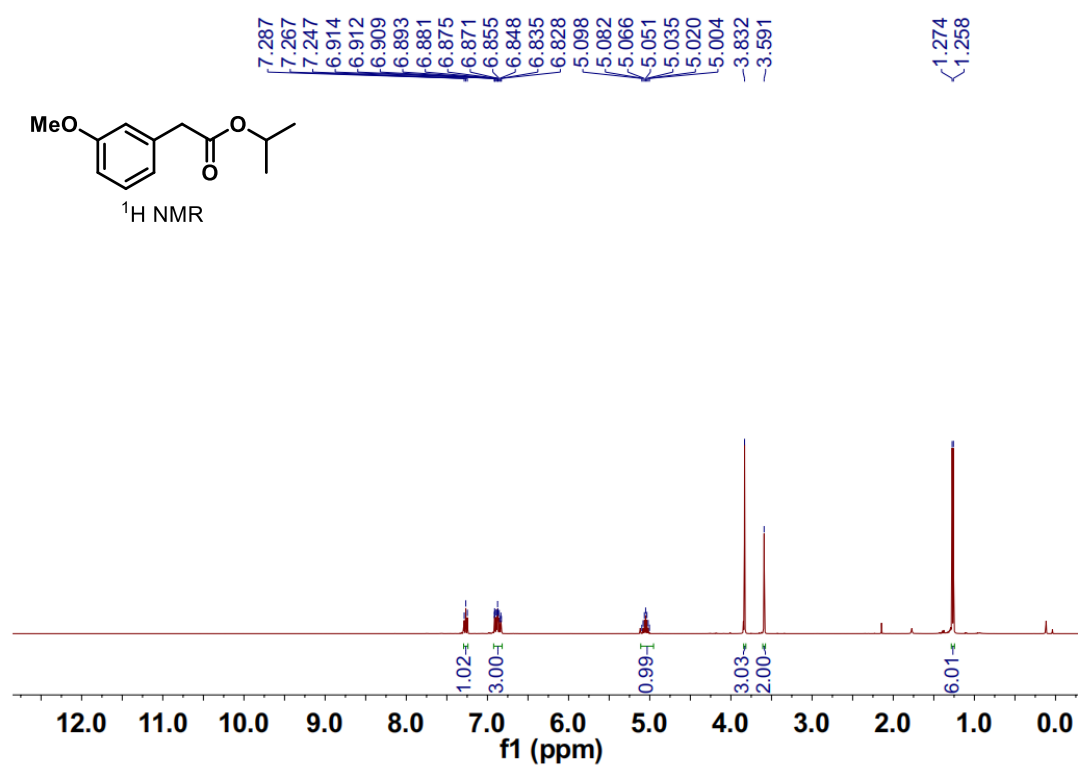

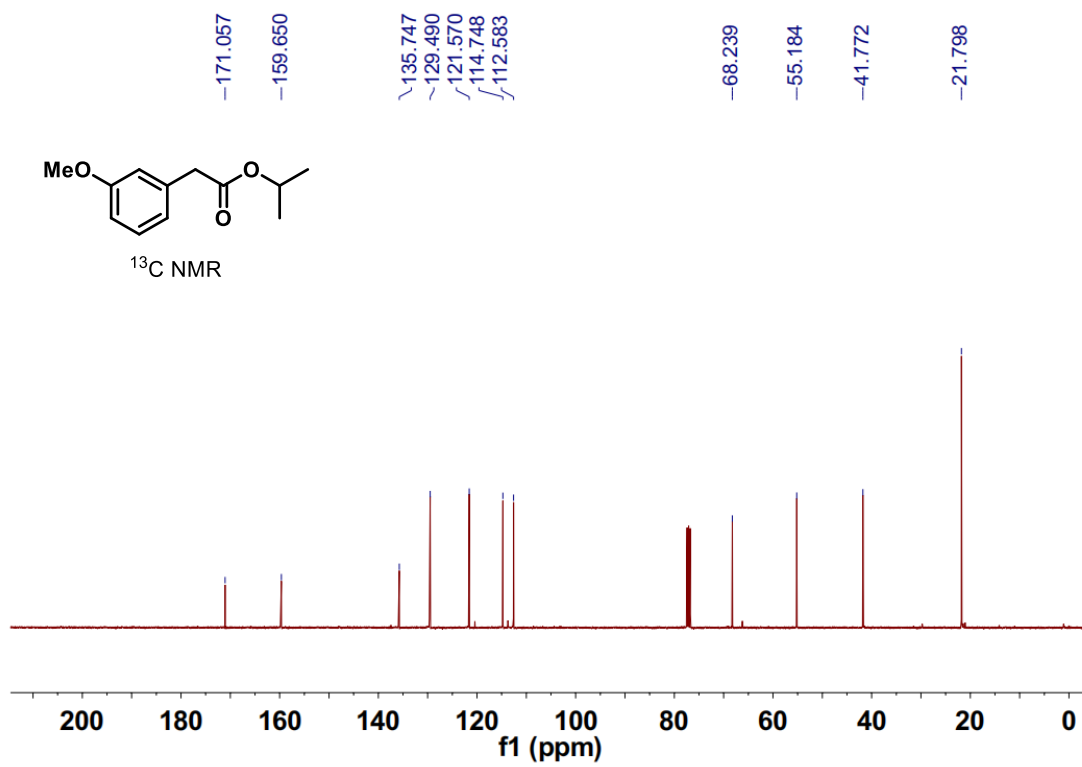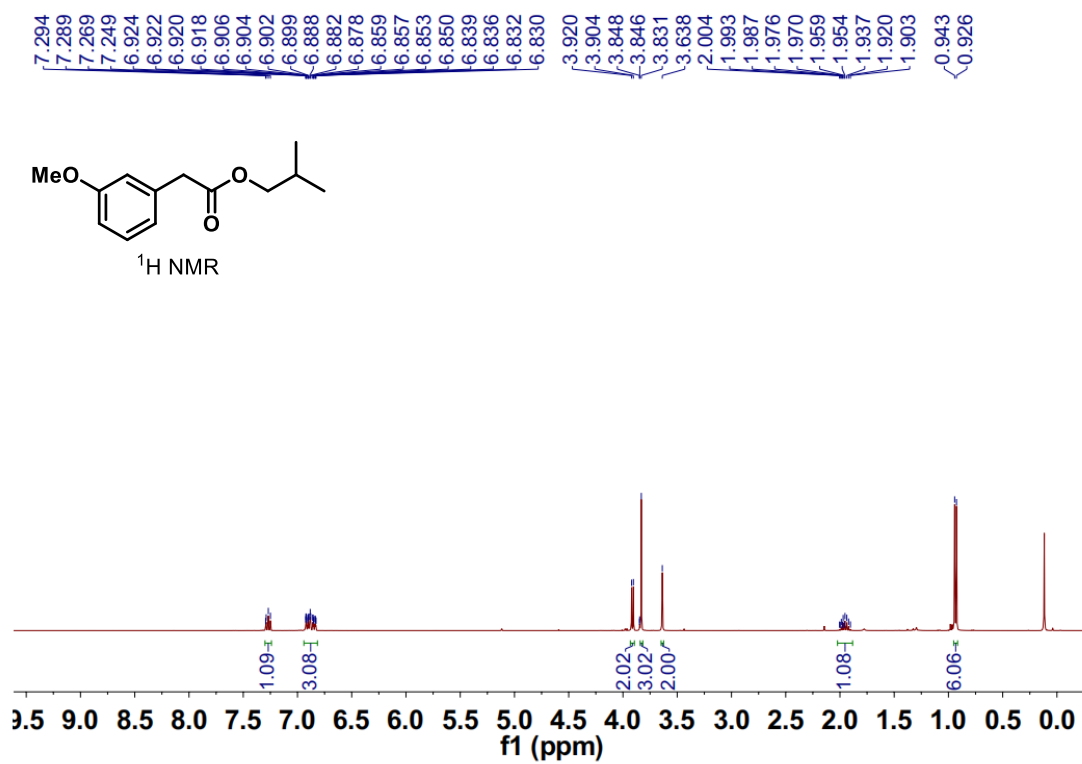

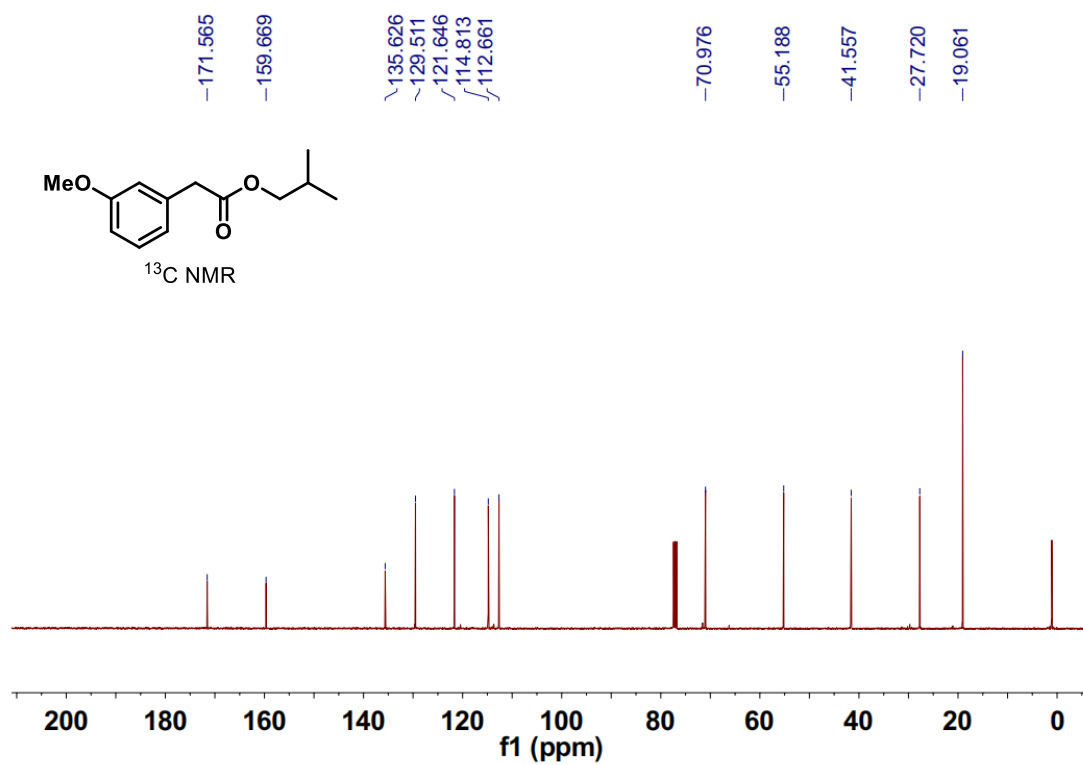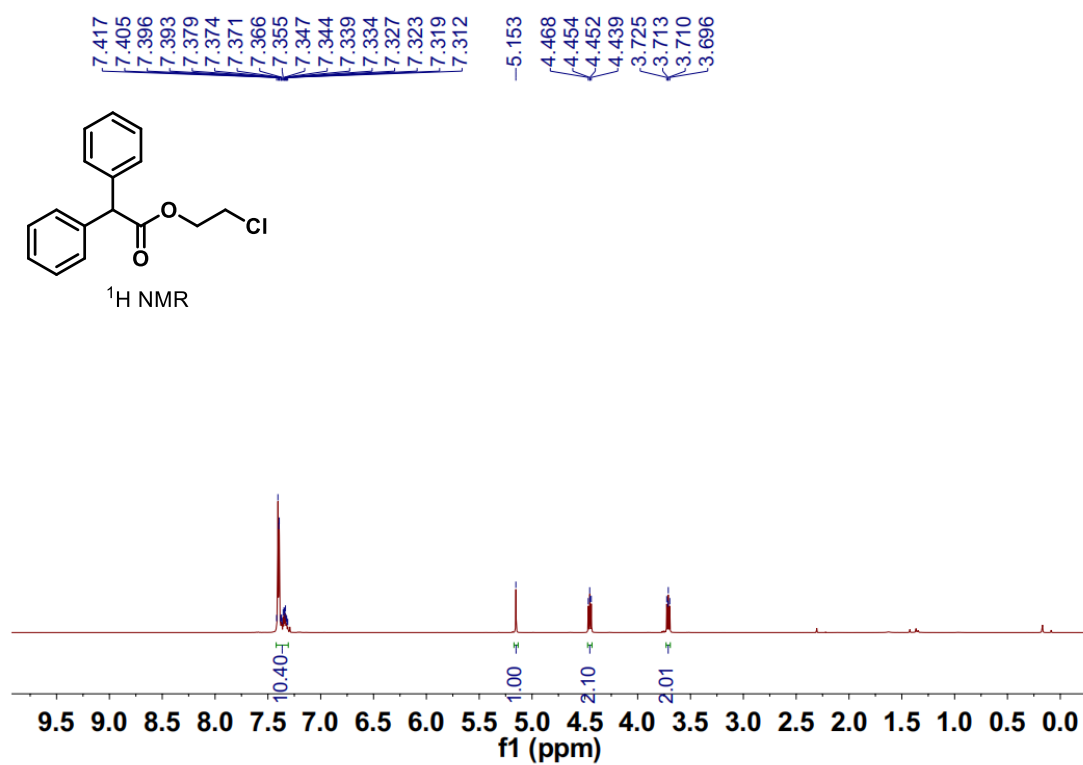

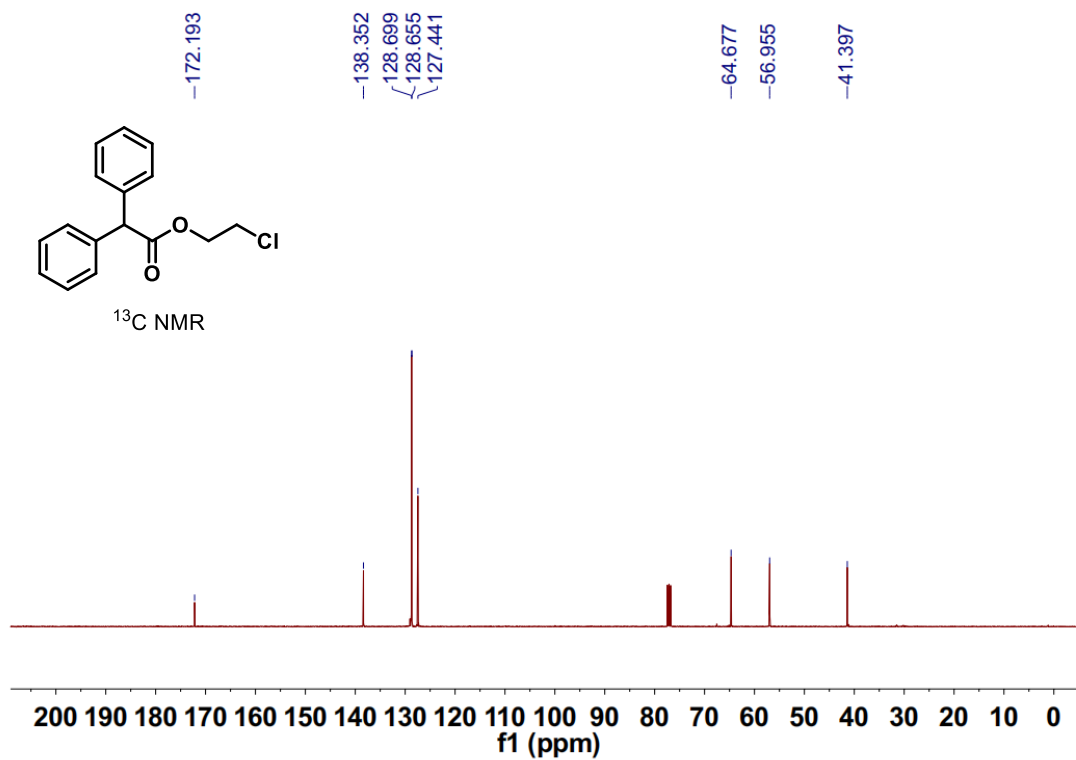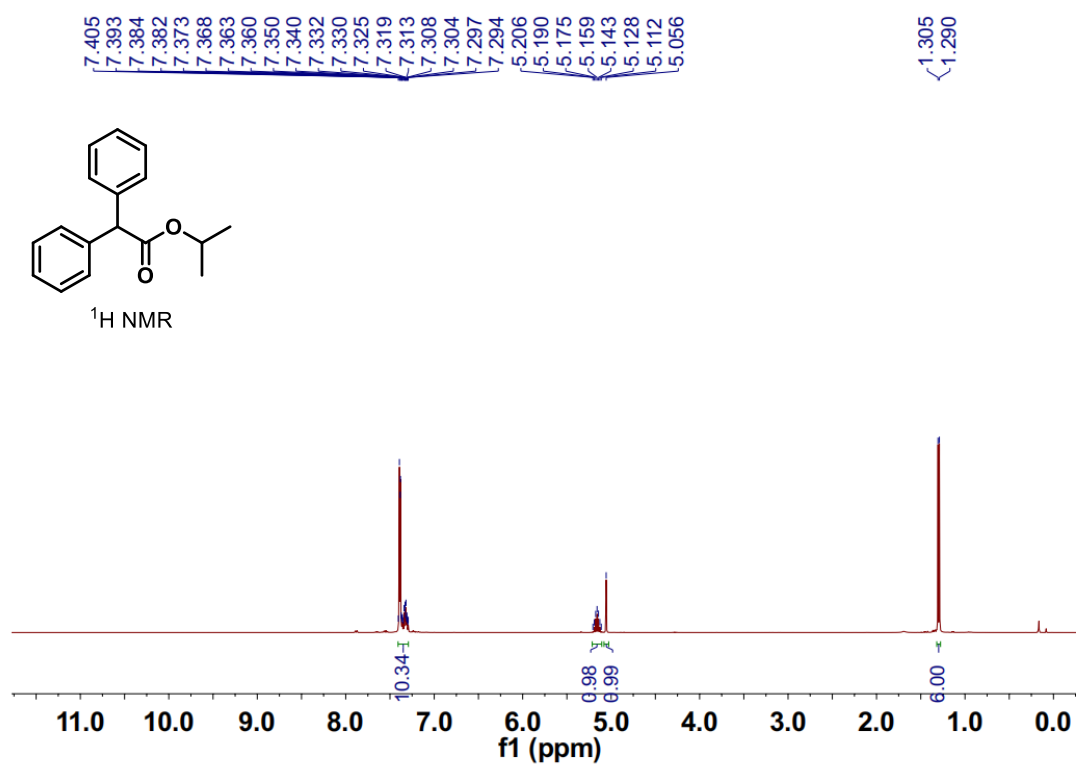

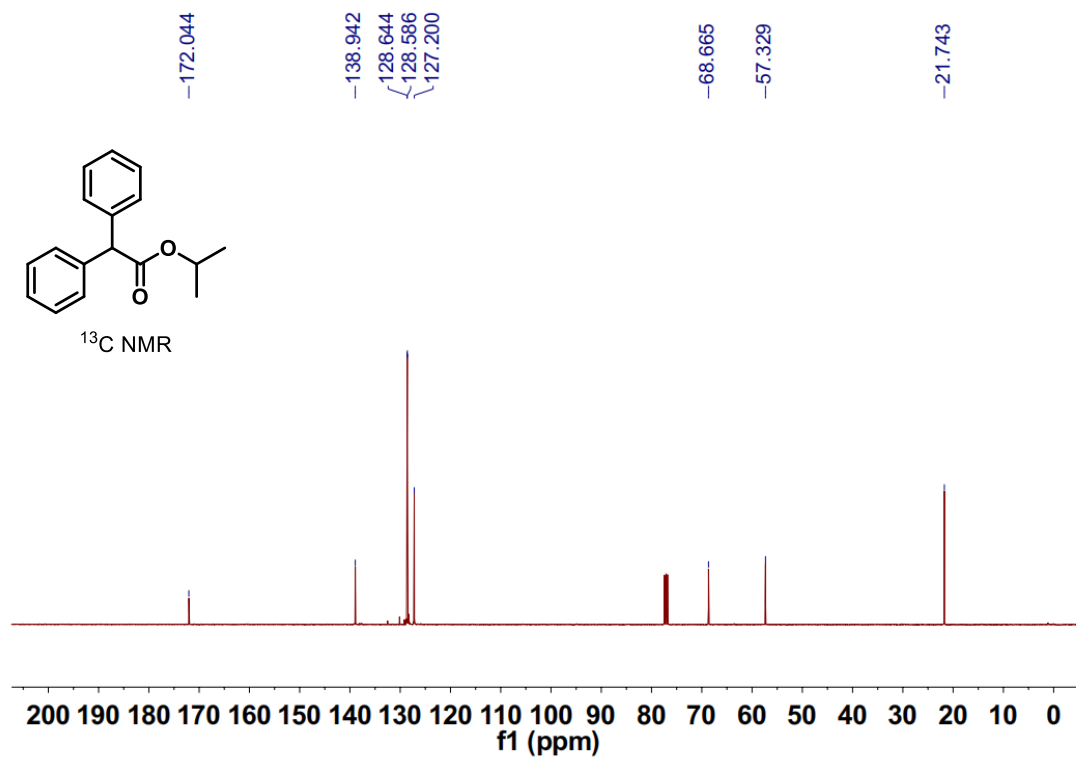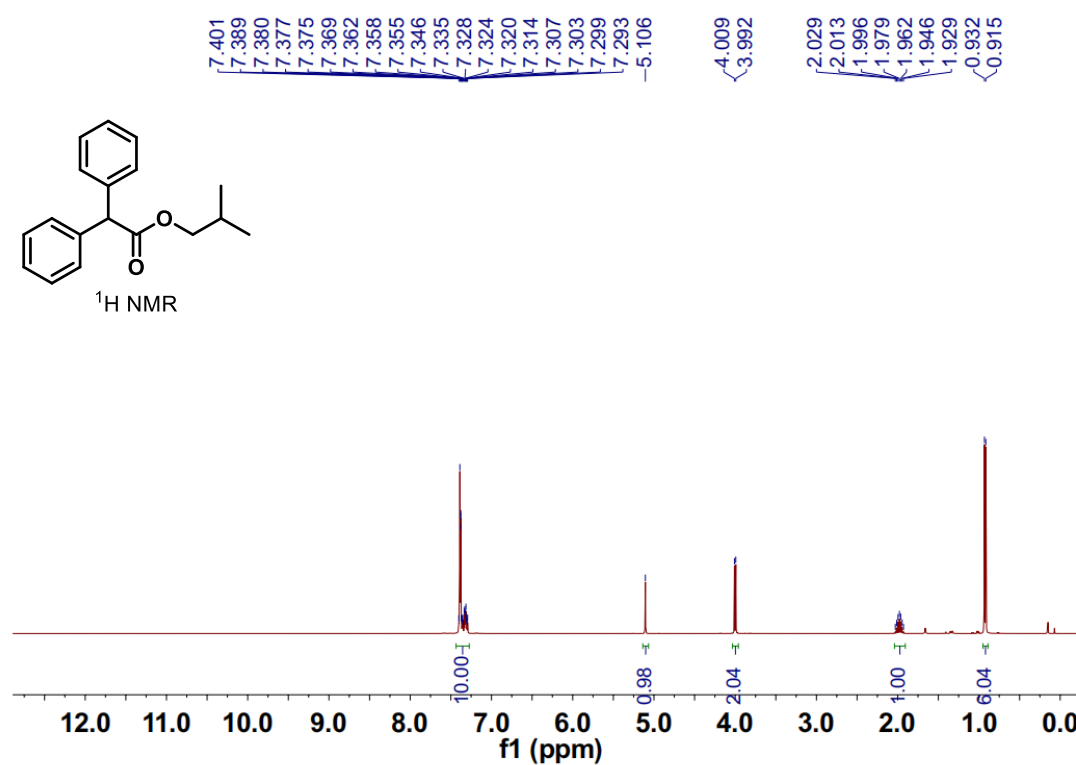

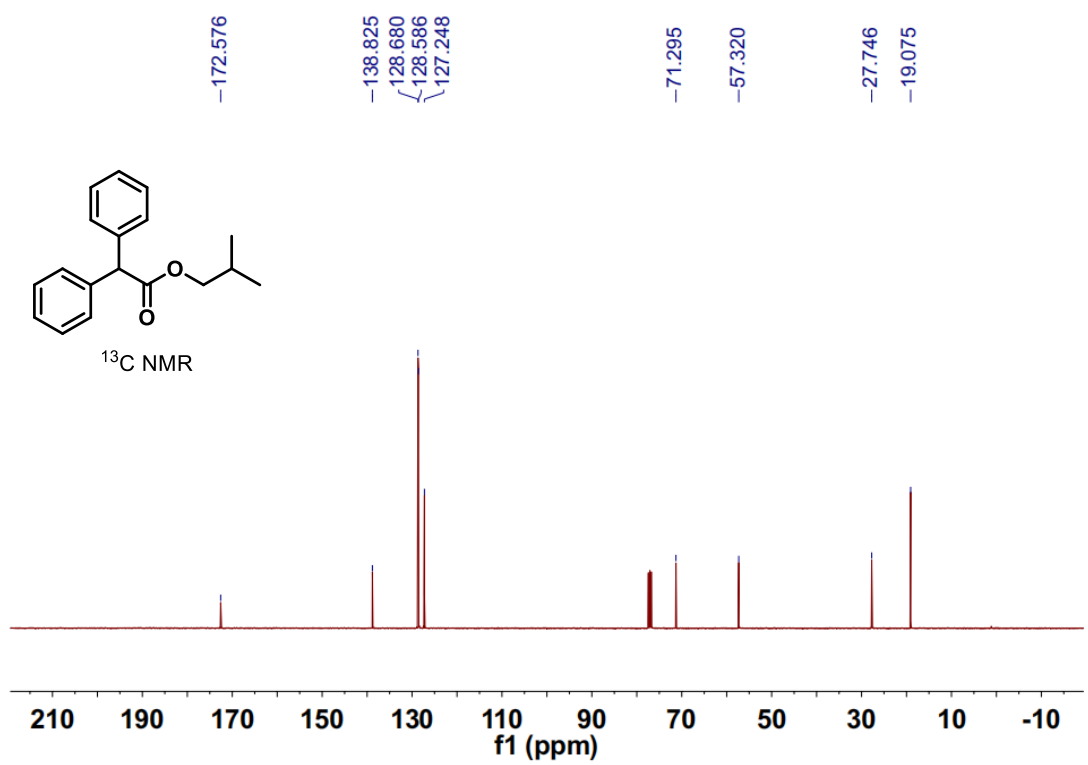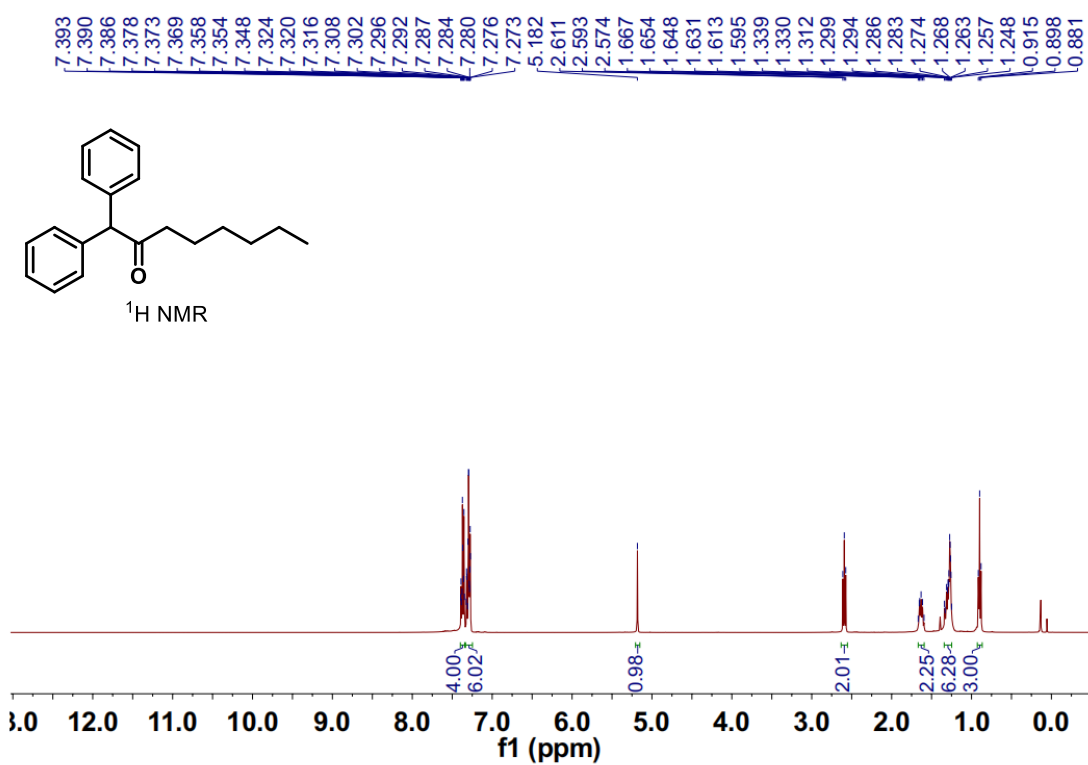

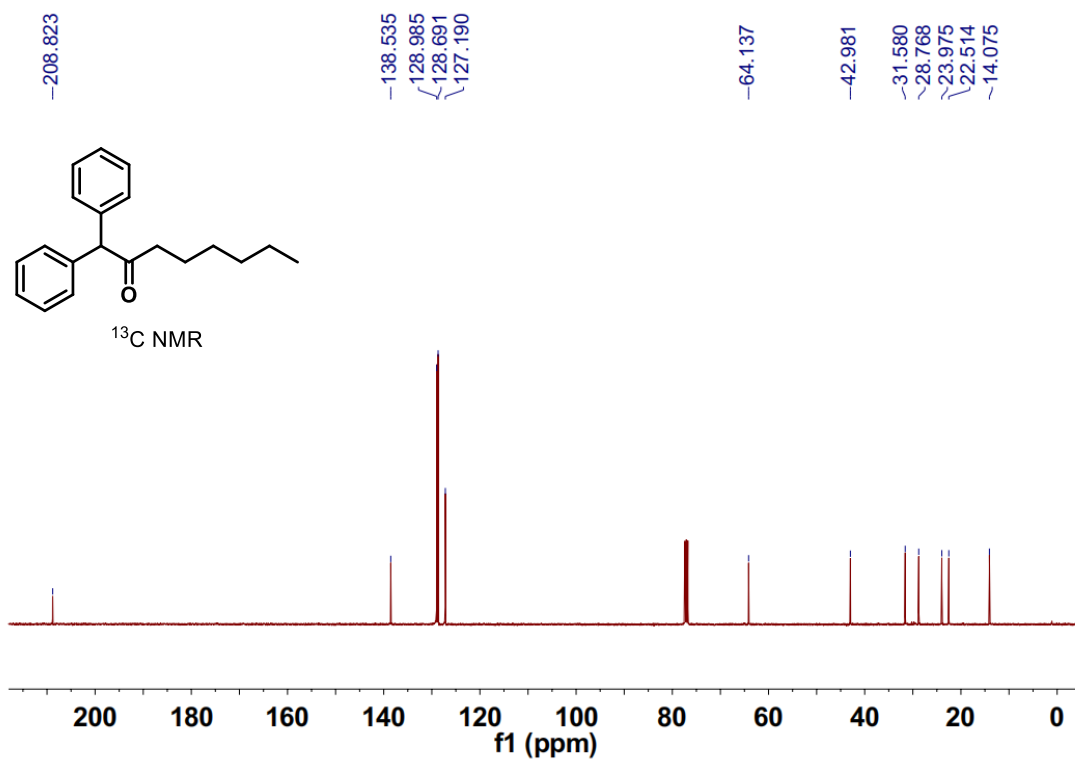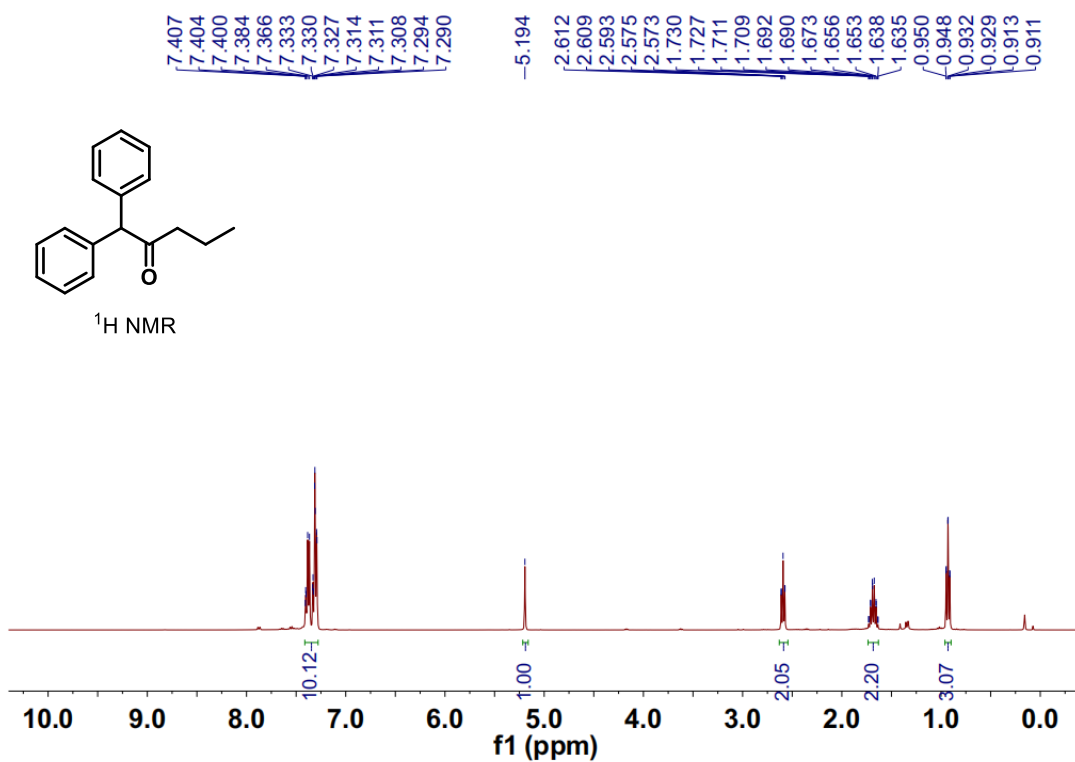

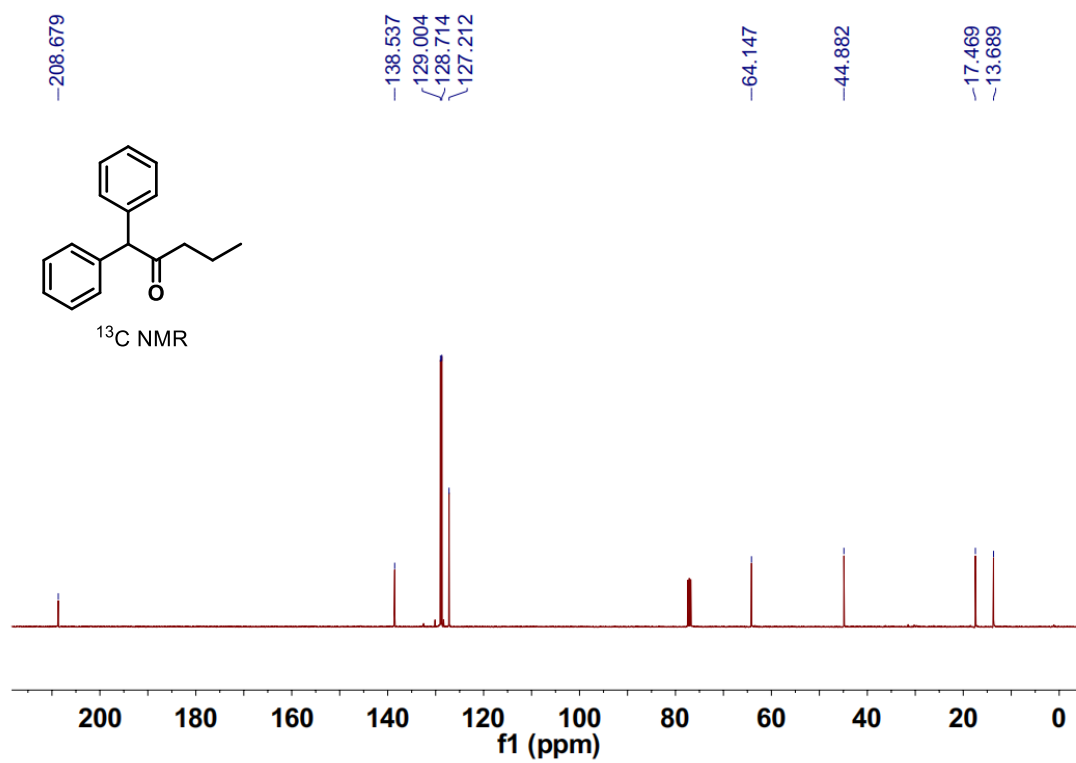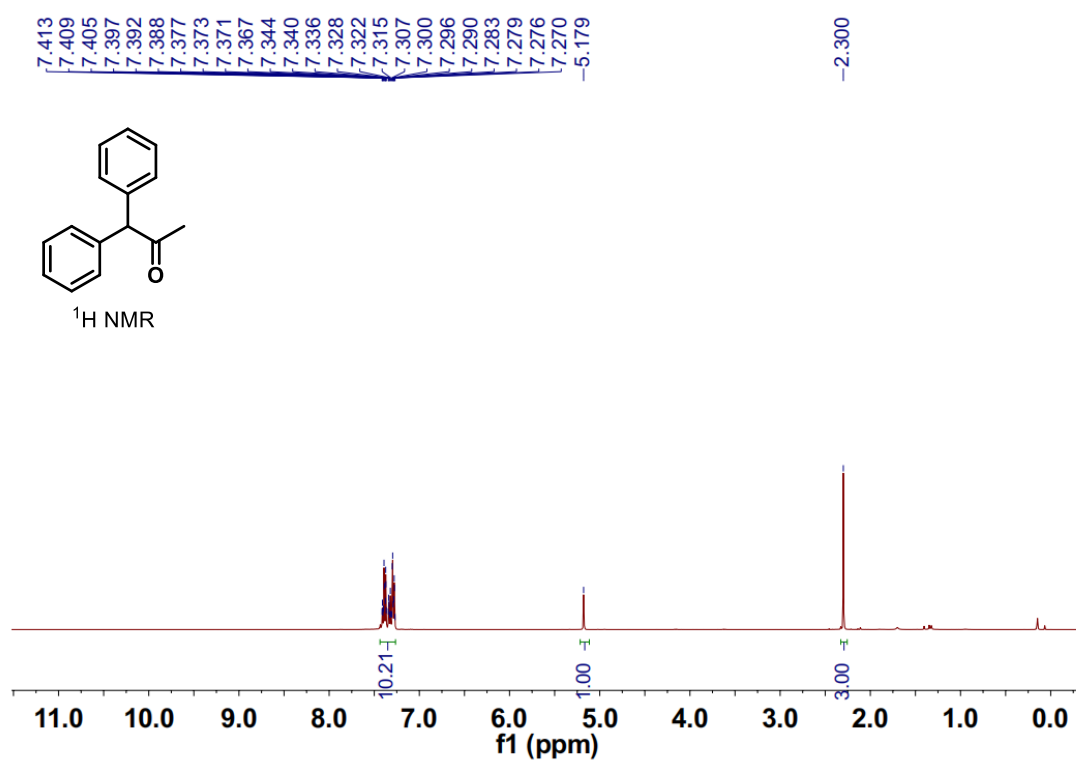

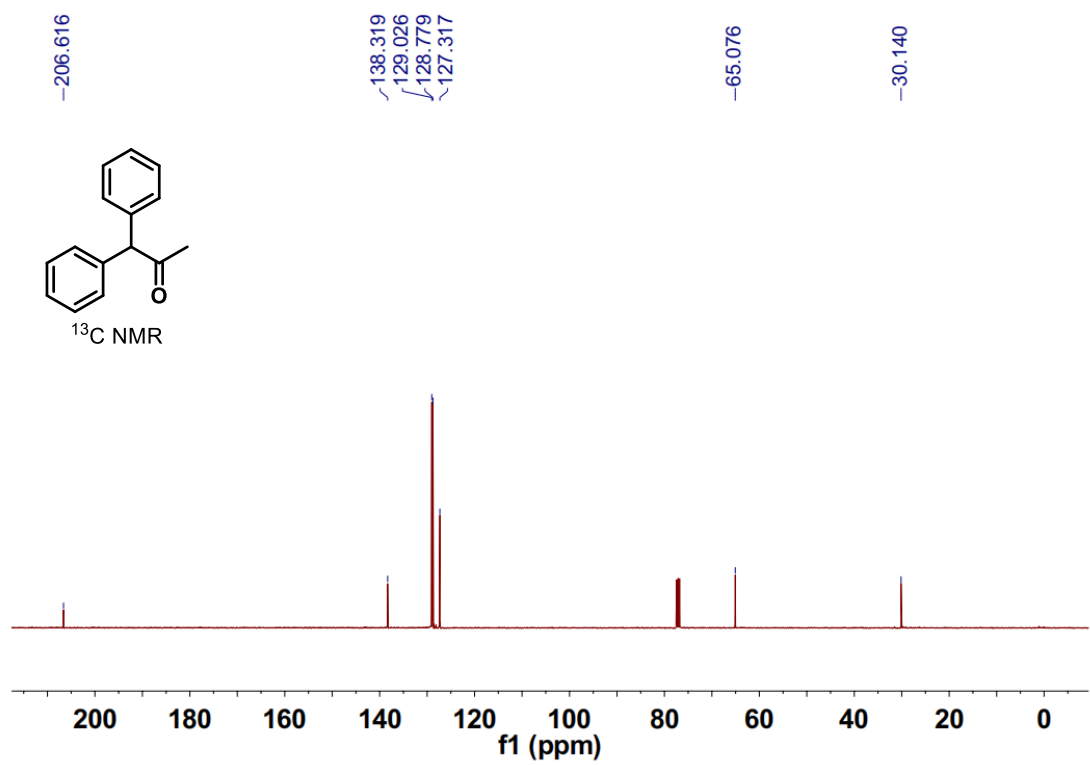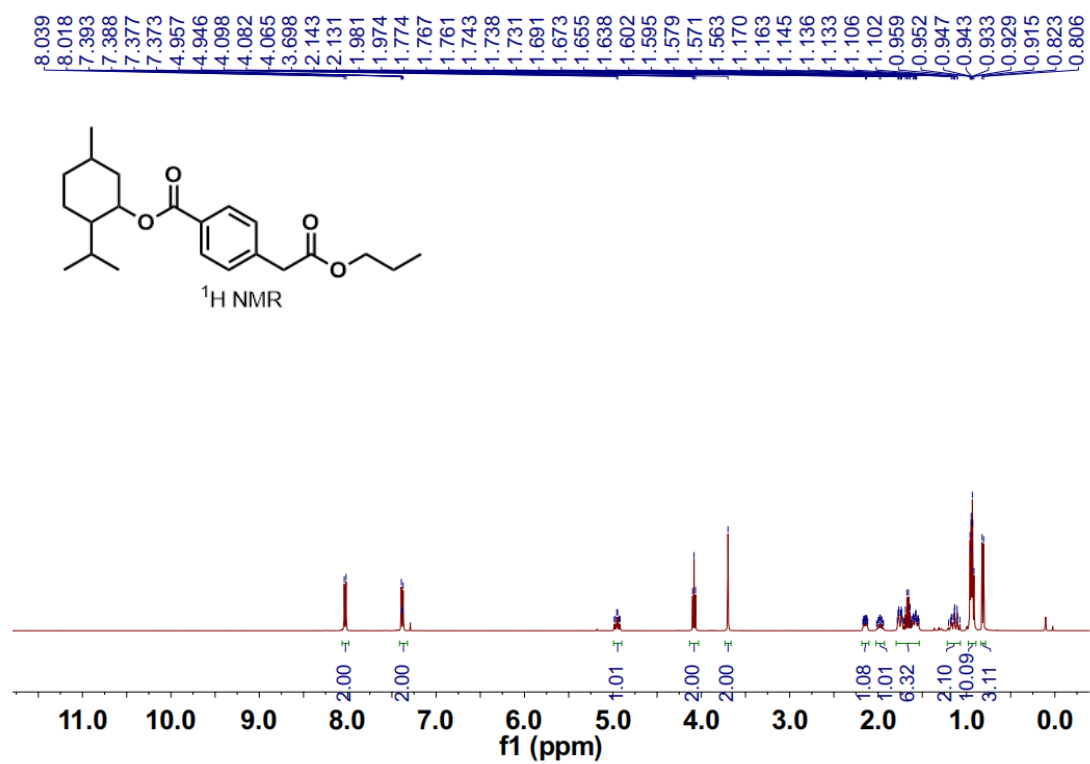

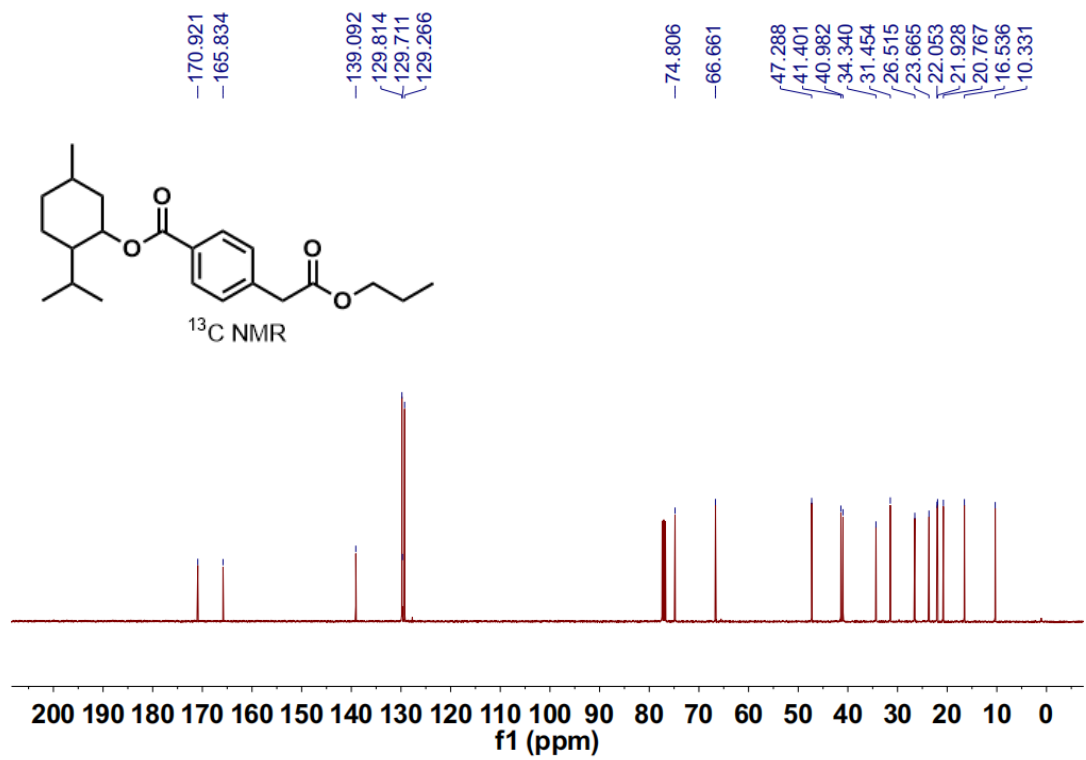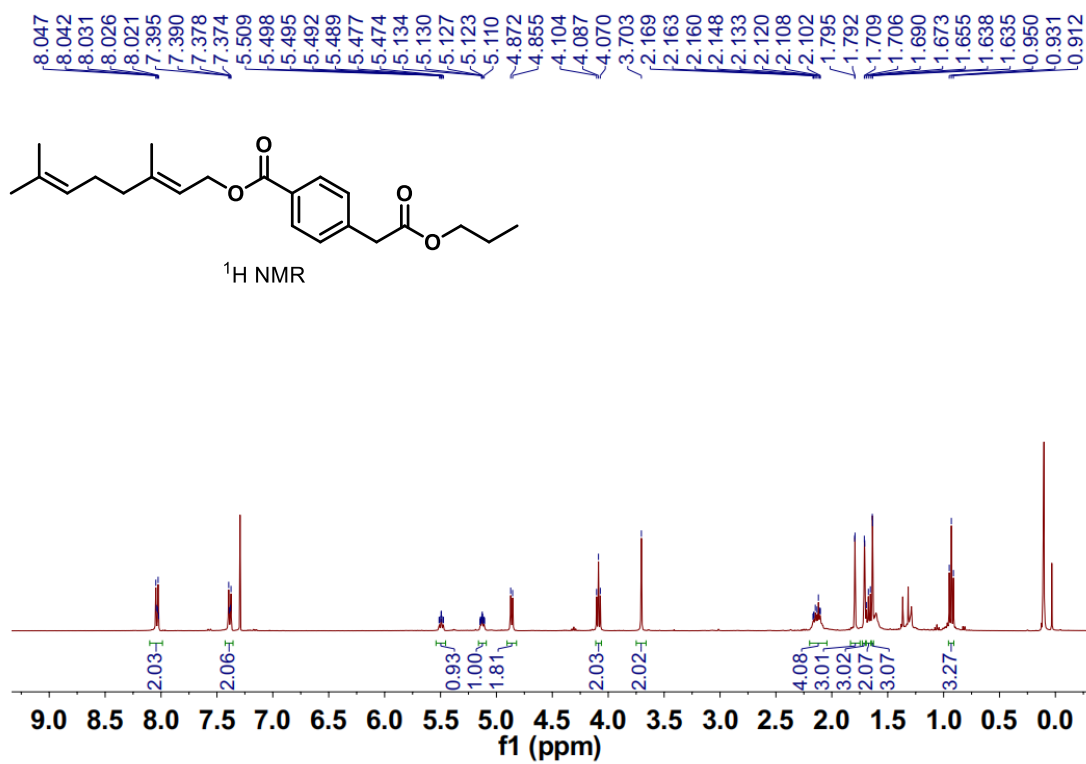

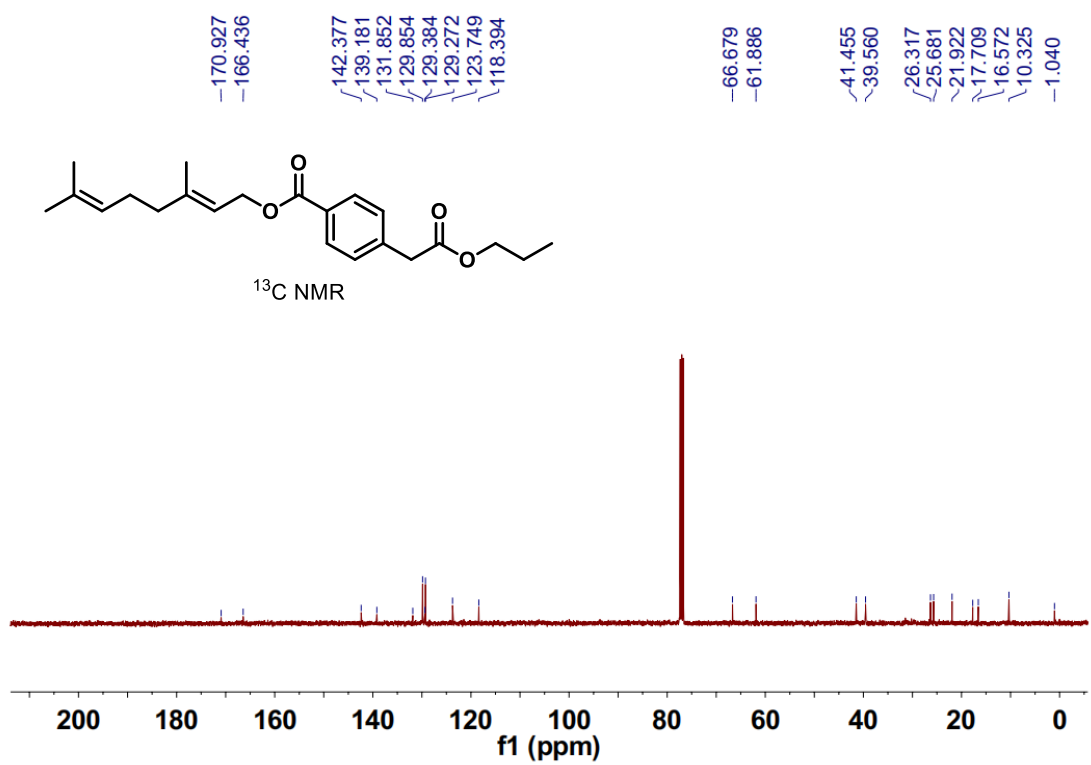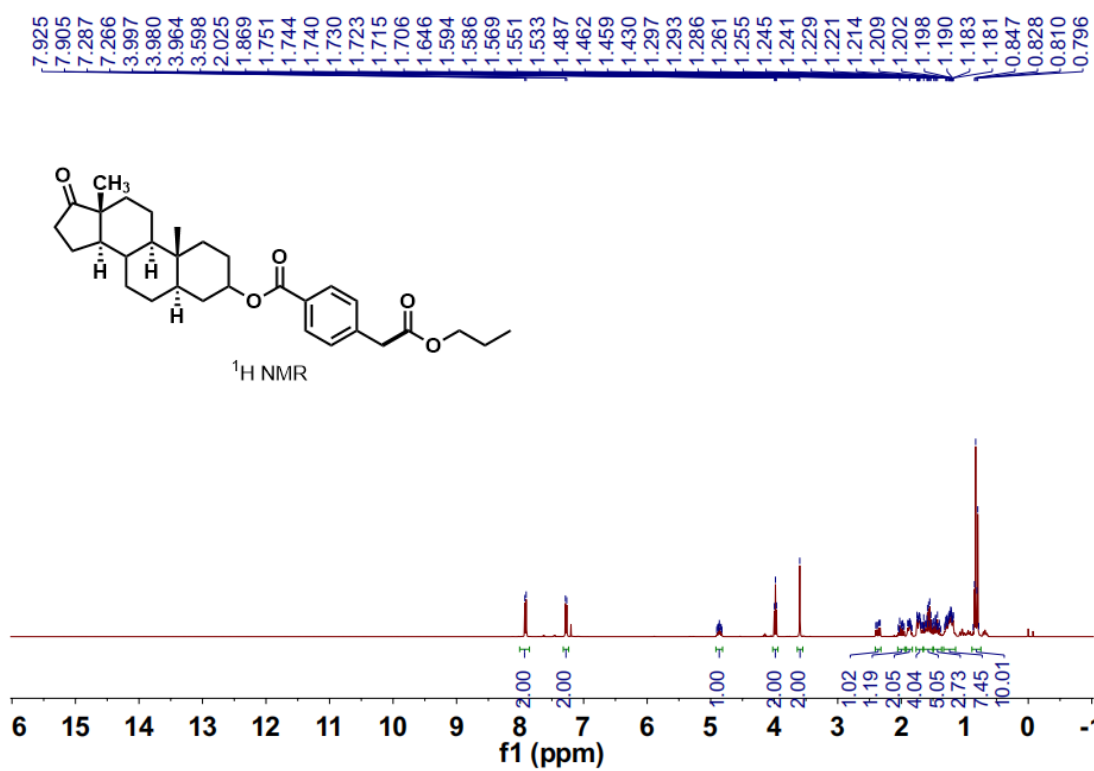

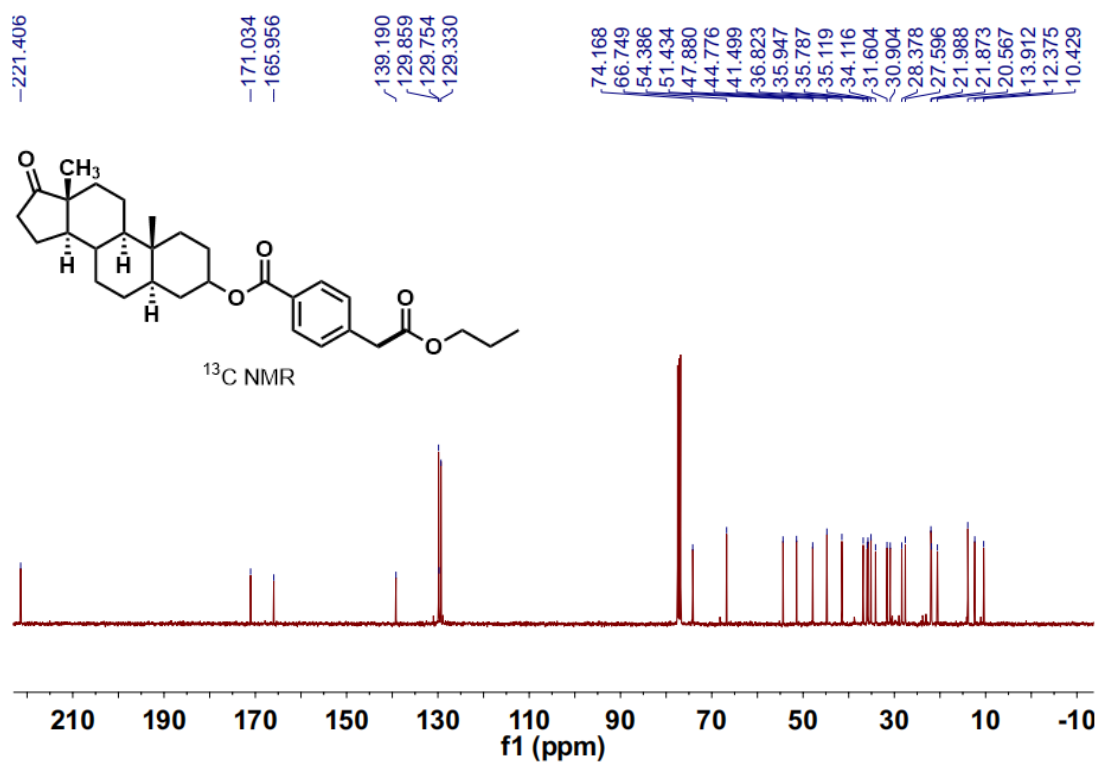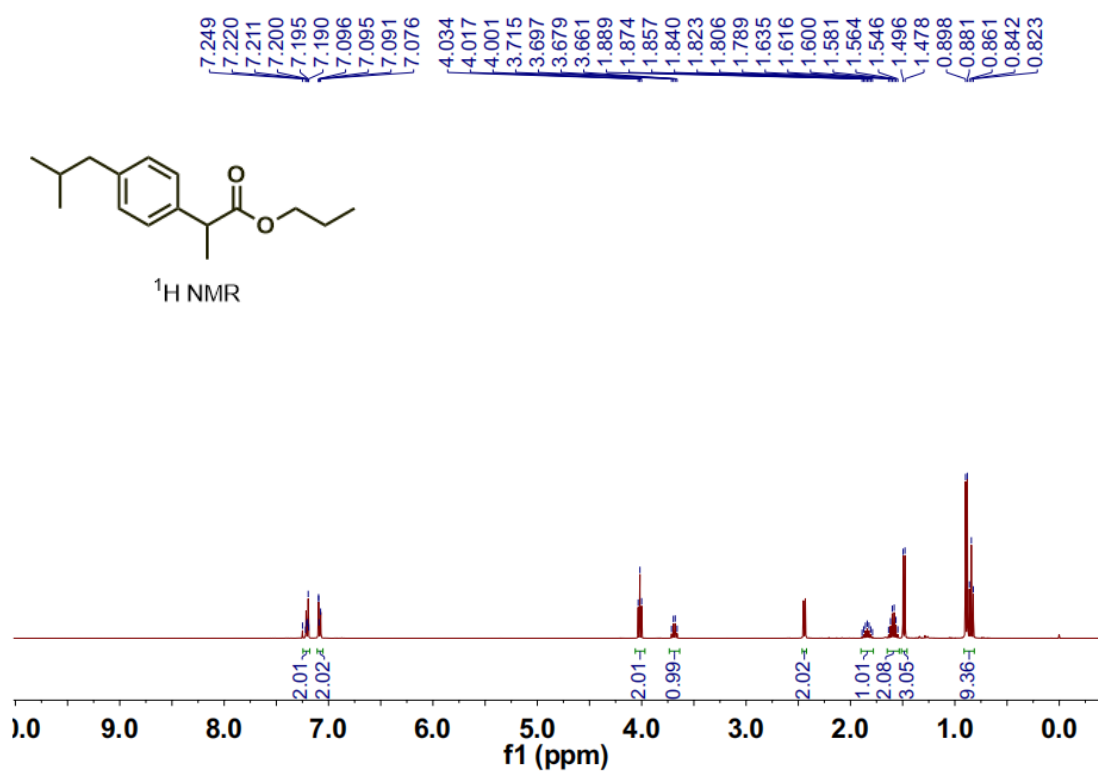

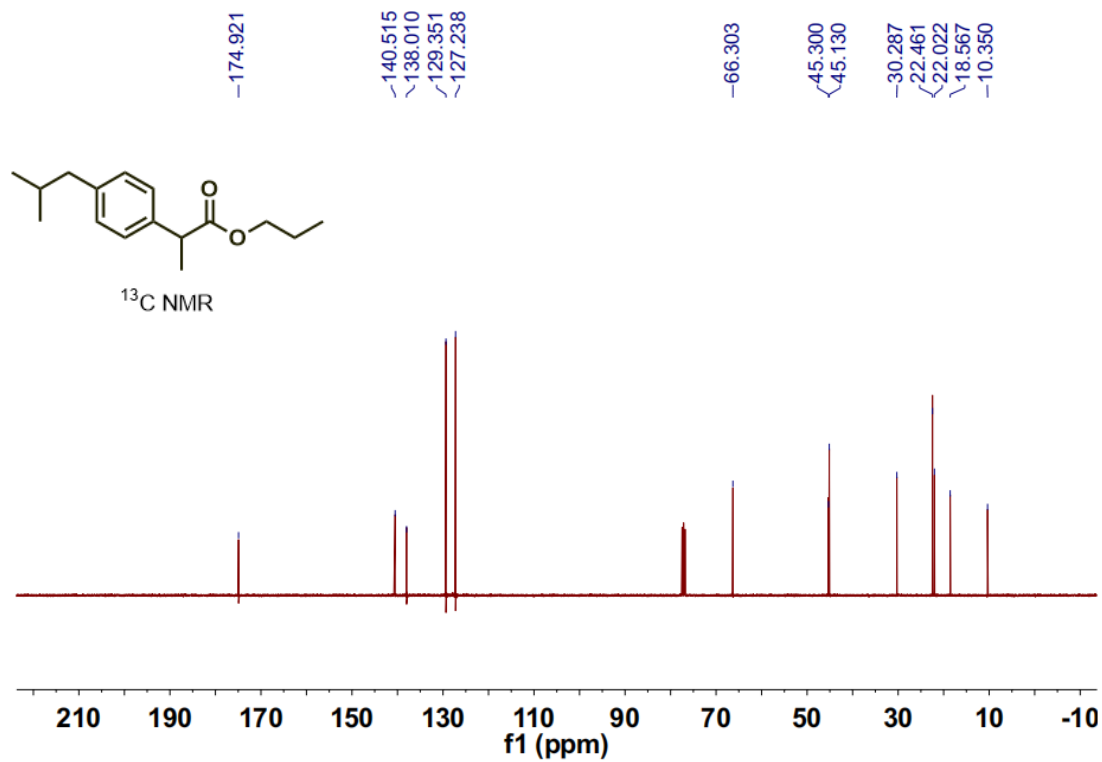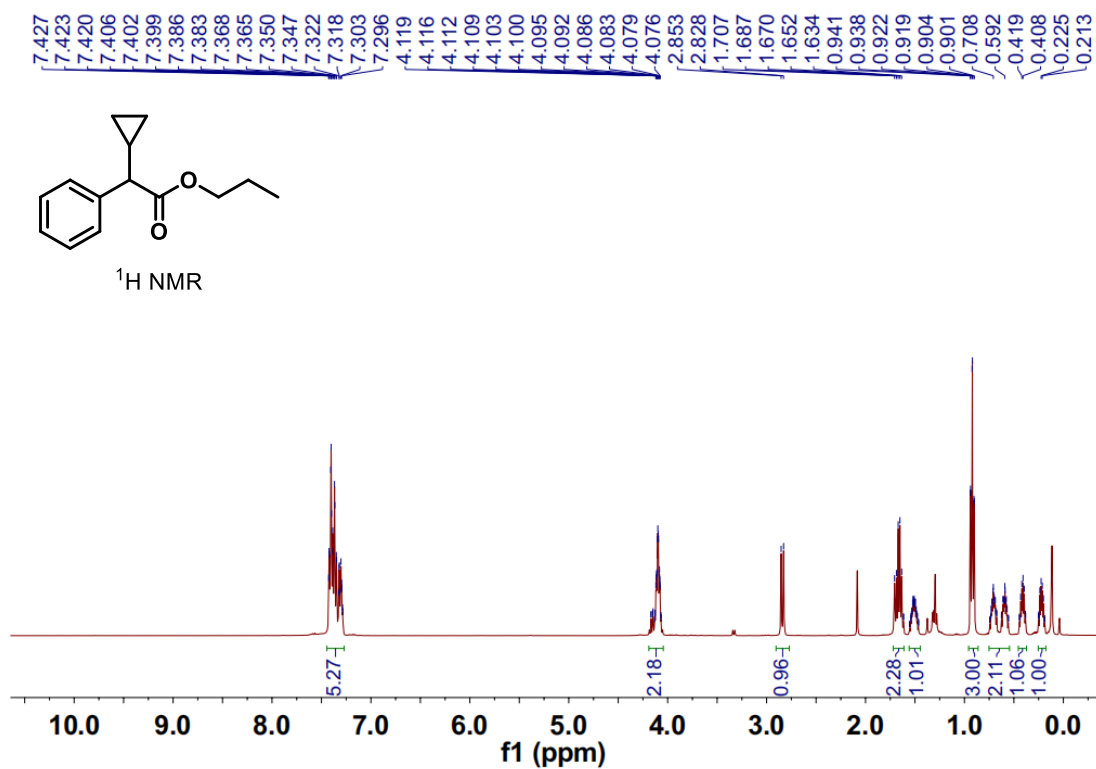

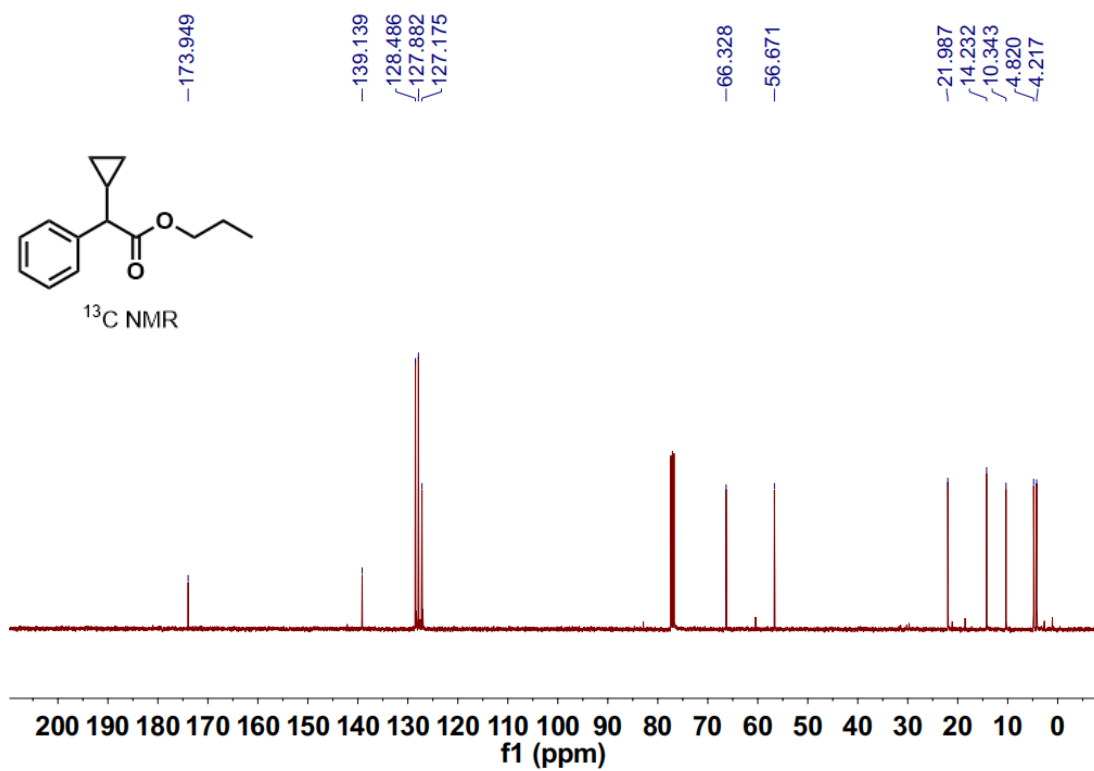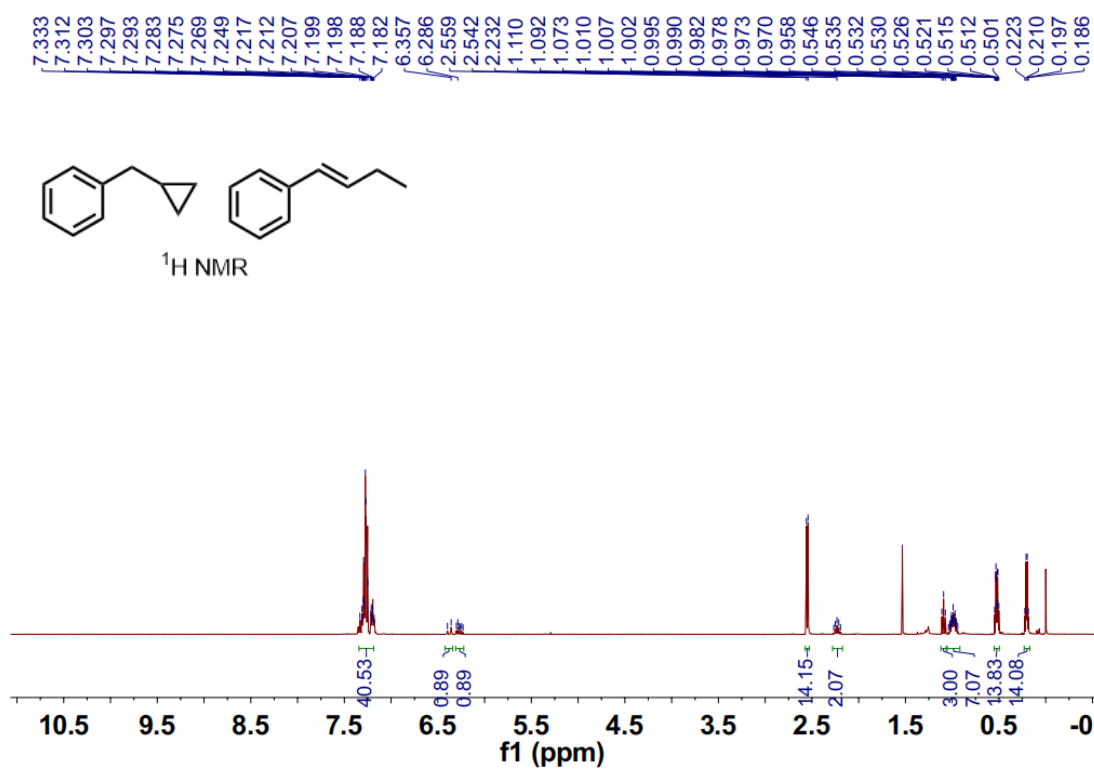

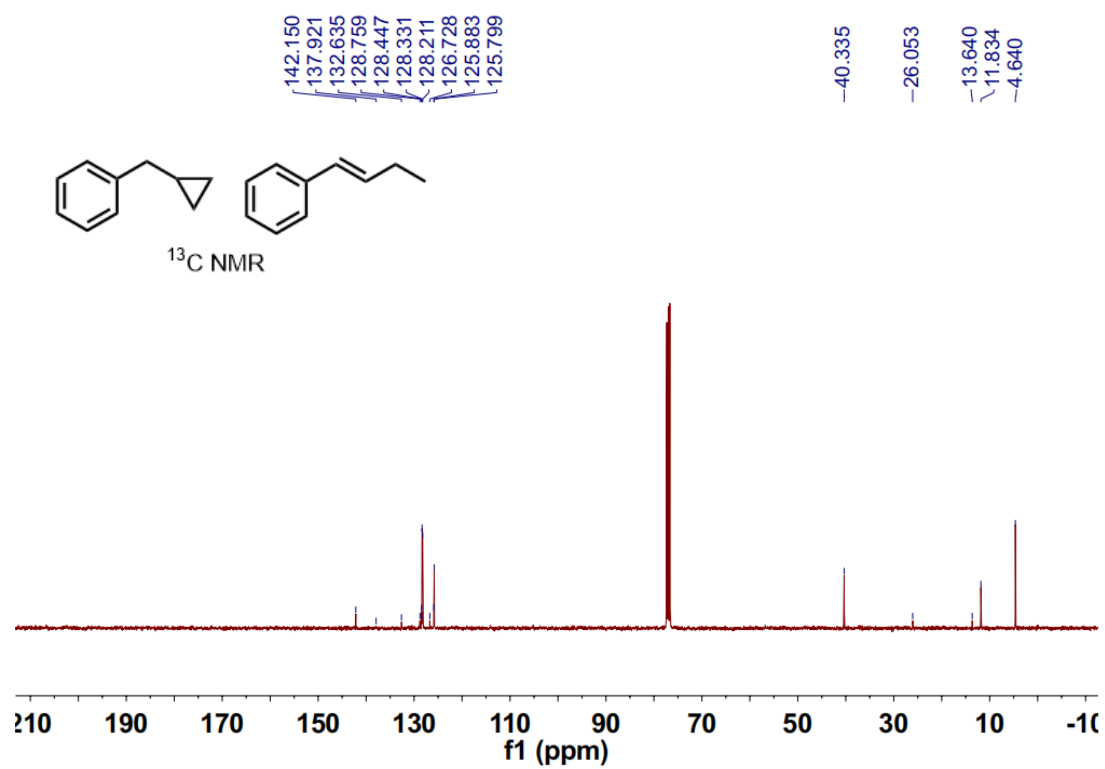

## References

- [1] Fabian L, Gómez M, Caturelli Kuran J A, et al. Efficient microwave-assisted esterification reaction employing methanesulfonic acid supported on alumina as catalyst [J]. *Synthetic Communications*, 2014, 44(16): 2386-92.
- [2] Sadeghian H, Attaran N, Jafari Z, et al. Design and synthesis of 4-methoxyphenylacetic acid esters as 15-lipoxygenase inhibitors and SAR comparative studies of them [J]. *Bioorganic & Medicinal Chemistry*, 2009, 17(6): 2327-35.
- [3] Grabulosa A, Frew J J R, Fuentes J A, et al. Palladium complexes of bulky ortho-trifluoromethylphenyl-substituted phosphines: Unusually regioselective catalysts for the hydroxycarbonylation and alkoxycarbonylation of alkenes [J]. *Journal of Molecular Catalysis A: Chemical*, 2010, 330(1-2): 18-25.
- [4] Mastitski A, Vellemäe E, Smorodina V, et al. Alcoholysis of primary amides in the presence of CF<sub>3</sub>SO<sub>3</sub>H [J]. *Organic Preparations and Procedures International*, 2023, 55(5): 458-68.
- [5] Umeda R, Muraki M, Nakamura Y, et al. Rhenium complex-catalyzed meinwald rearrangement reactions of oxiranes [J]. *Tetrahedron Letters*, 2017, 58(24): 2393-5.
